# Supplementary material
Source: PubMed Central journal article supplement (PMC2783758)
Supplement: NIHMS147700-supplement-1.pdf [file NIHMS147700-supplement-1.pdf]

**Figure S1. Representative gating scheme for flow cytometric analysis of the tumor-splenocyte co-cultures.**

Naïve, unfractionated splenocytes from WT C57BL/6J mice were co-cultured with irradiated RMA5 cells as described in the Materials and Methods for 5 days. Cells were harvested from the co-cultures and stained with primary-conjugated antibodies against CD4, CD8, and Foxp3 to assess yields of various T cell compartments by flow cytometry.

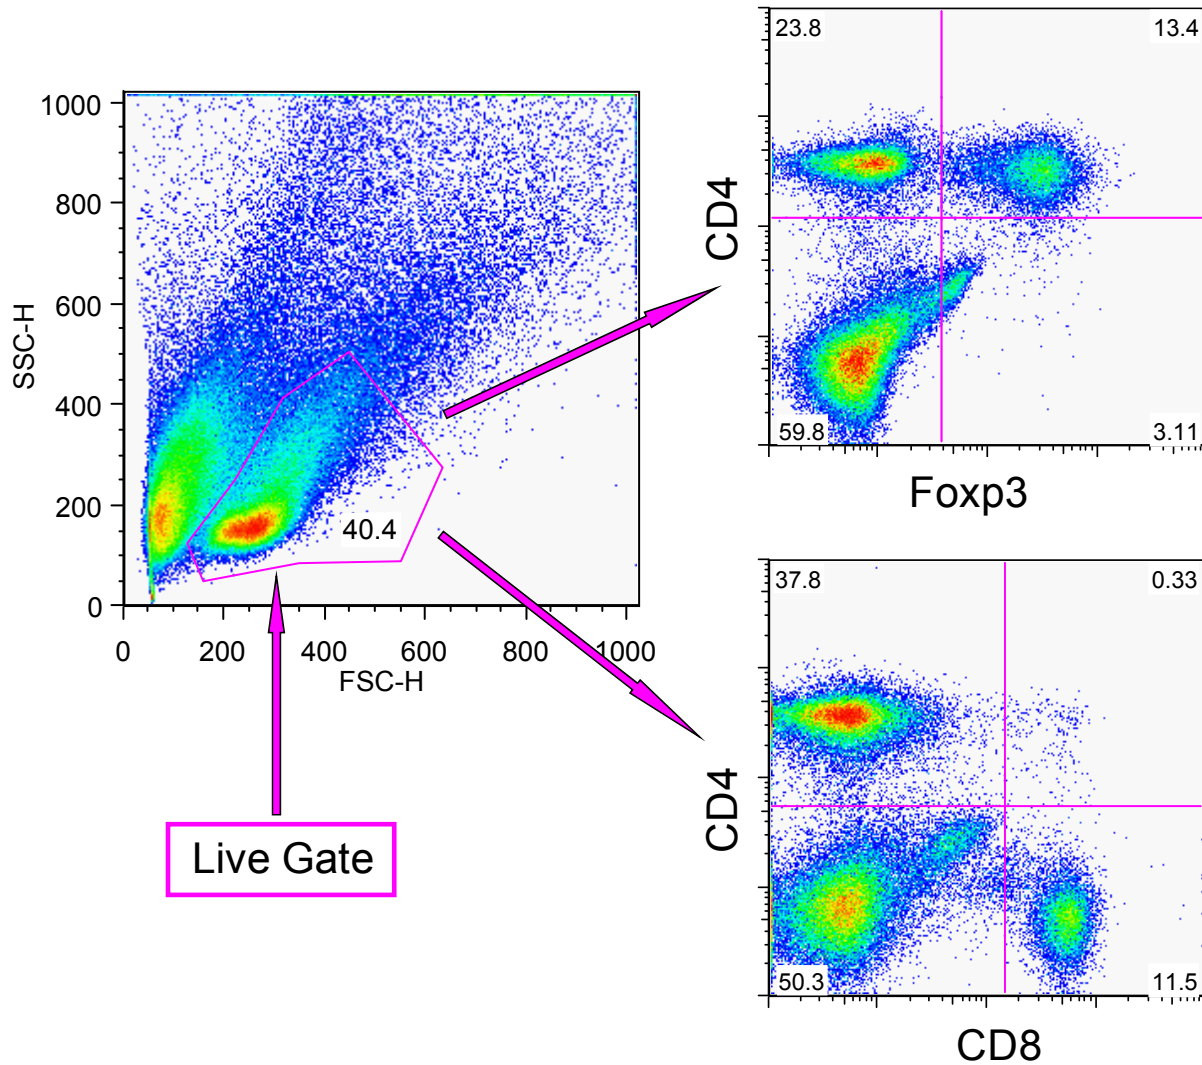

**Figure S2. Non-T accessory splenocytes and IL-2 are required for Treg expansion.**

**A.**  $1 \times 10^6$  Pan T cells were isolated from the resting spleens of WT 129/SvPas or C57BL/6J mice, and cultured in 2 ml of standard K10 medium only, or in the presence of  $3 \times 10^6$  T cell depleted (TcD) splenocytes, or  $1.2 \times 10^5$  irradiated RMAS tumor cells, or both, for 5 days.

**B.** Instead of RMAS cells, cryopreserved primary APL cells harvested from the spleens of 3 independent leukemic mCG-PML-RAR $\alpha$  transgenic mice were irradiated (3,000 Rads) and used at the same doses in the co-cultures.

**C.**  $4 \times 10^6$  unfractionated splenocytes were cultured with  $1.2 \times 10^5$  irradiated RMAS tumor cells for 5 days. At the beginning of the culture, a TGF- $\beta$  neutralizing antibody (1D11) or its isotype control (11711.11), or an IL-2 neutralizing antibody (JES6-5H4) or its isotype control (R35-95) were added to a final concentration of 10  $\mu$ g/ml.

**D.** Identical to Panel C, except that primary APL cells were irradiated and used in the cultures. At the beginning and the end of co-cultures, CD4<sup>+</sup>Foxp3<sup>+</sup> Treg cell numbers were assessed as described in the Materials and Methods. Treg cell expansion is presented as fold-change of the final yield over initial input. Shown are summaries of 2 independent experiments. Data points are shown as mean  $\pm$  SD; Two-tailed t-tests were used to determine statistical significance (\*P<0.05, \*\*P<0.01, \*\*\*P<0.001).

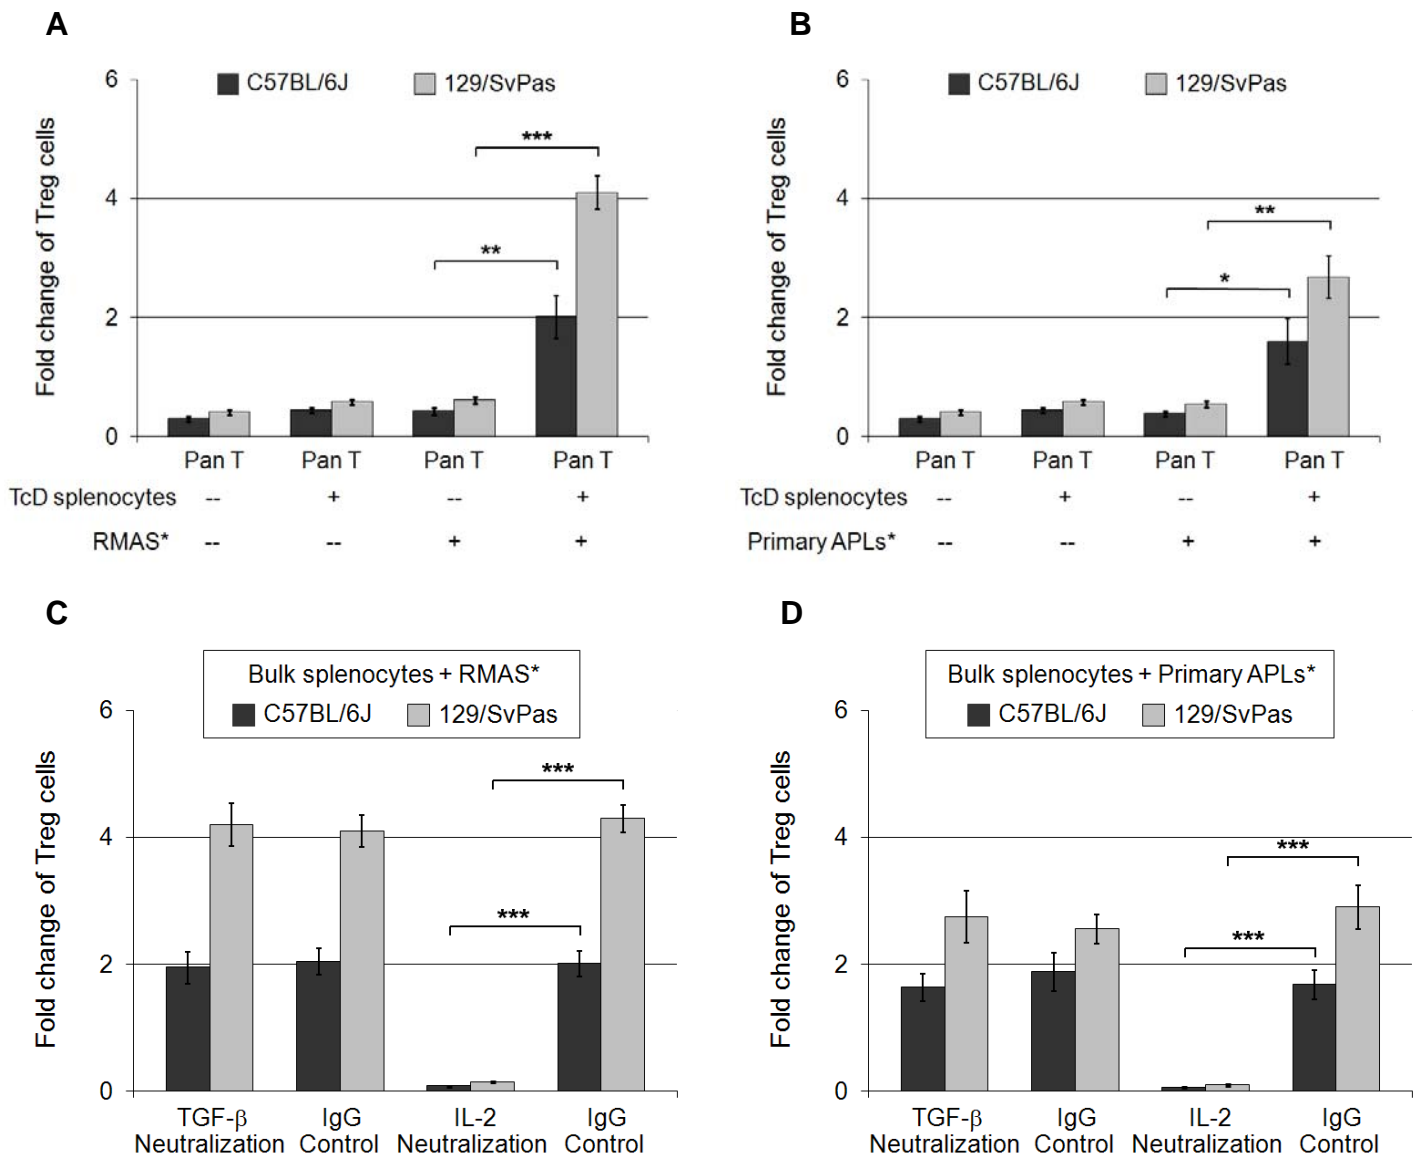

**Figure S3. Cytokine receptor expression profiles of naïve and tumor-associated Treg cells.**

Naïve Treg cells were purified from the resting spleens of FoxP3-GFP knock-in mice made in the 129/SvJ strain. Ascites Treg cells are tumor-associated FoxP3-GFP<sup>+</sup> cells that were sorted from the tumor ascites of 129/SvJ mice IP-injected with 1 x 10<sup>6</sup> RMAS cells 5 days earlier; Spleen<sup>T</sup> Treg cells were purified from the spleens of the same tumor-bearing mice. The purity of the sorted Treg cells is >99%. Affymetrix MOE430v2 arrays were used to perform gene expression studies. Shown here is absolute abundance of selected cytokine receptor gene mRNAs. The complete set of Treg gene expression data is deposited in Gene Expression Omnibus (GEO) microarray database (<http://www.ncbi.nlm.nih.gov/geo/>), accession number GSE13409. Two-tailed t-tests were used to determine statistical significance (\*P<0.05, \*\*P<0.01, \*\*\*P<0.001; ▽ indicates below detection limits of MAPs; Open o indicates an “absent” call on the Affymetrix arrays).

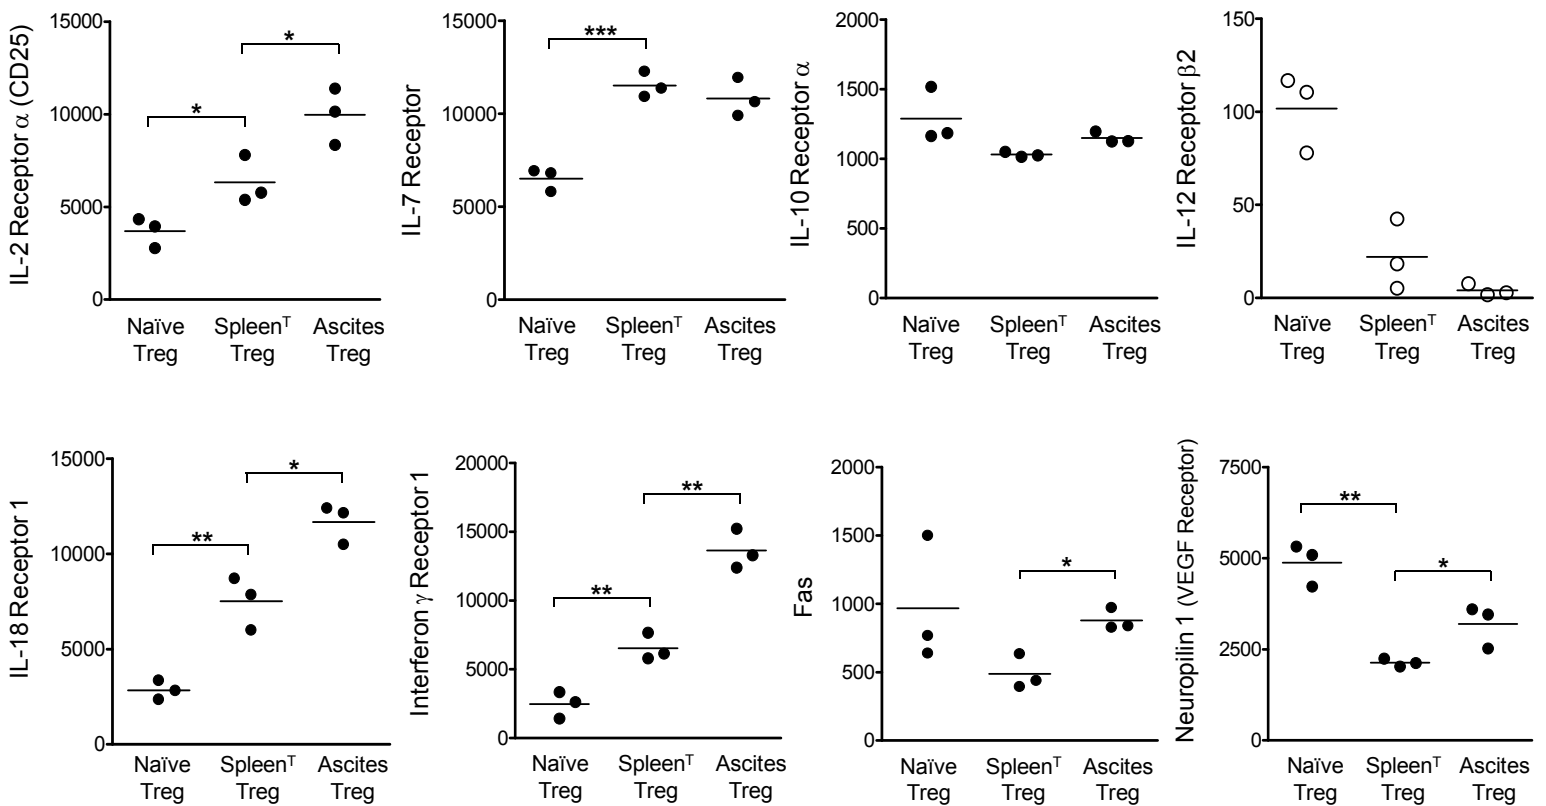

**Figure S4. CFSE-labeled Treg cells proliferated differentially.**

MACS-purified CD4<sup>+</sup>CD25<sup>+</sup> Treg cells were labeled with CFSE and mixed with WT splenocytes and irradiated RMA3 cells for 4 days. Representative histograms of CFSE<sup>+</sup> CD4<sup>+</sup>Foxp3<sup>+</sup> Treg cells are shown at day 0 and day 4. A subset of Treg cells retained high levels of CFSE, while other subpopulations of Treg cells diluted CFSE signal to lower levels by proliferating more extensively.

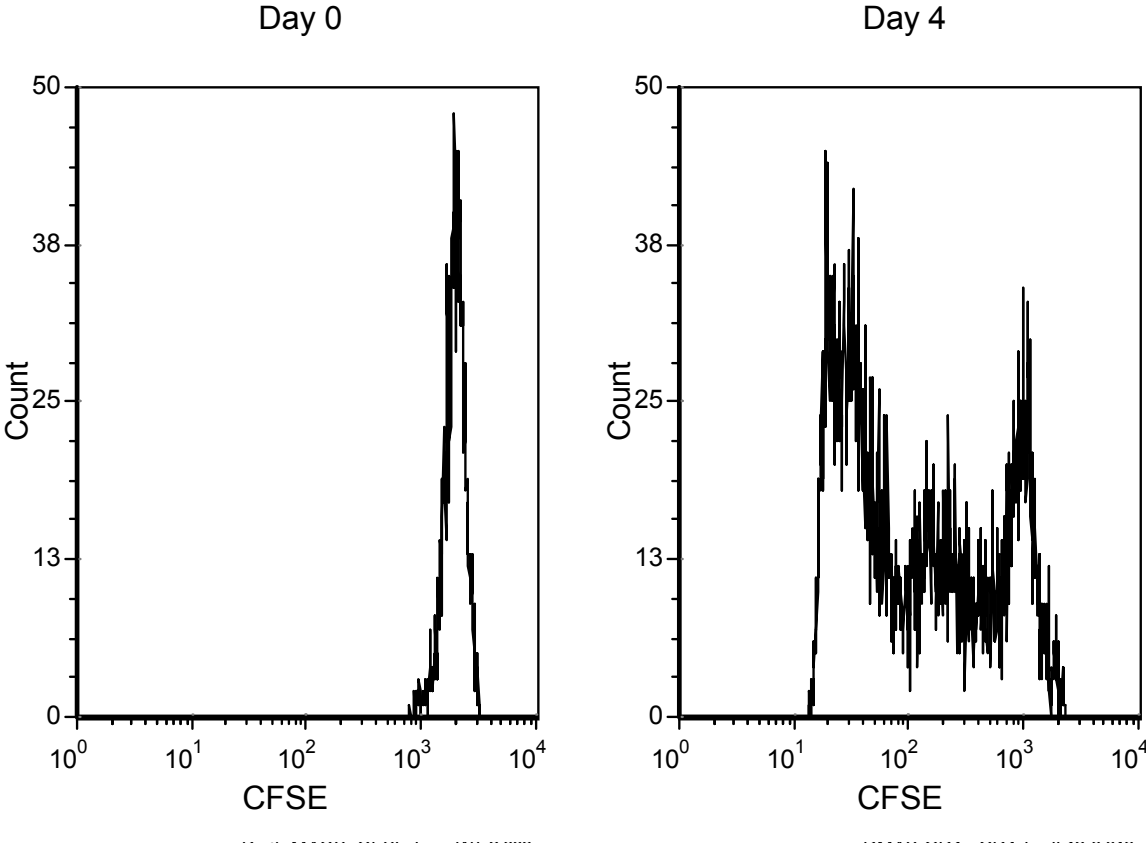

**Figure S5. IL-12 treatment increases IFN $\gamma$  secretion, and decreases IL-2 secretion.**

Naïve, unfractionated splenocytes from WT mice were cultured alone or with irradiated RMA cells for 5 days in the presence of the indicated doses of IL-12, as described in the Materials and Methods. IFN $\gamma$  and IL-2 concentrations were measured by performing ELISA assays (e-Bioscience) using the cell-free media harvested from the cultures. Shown are representative data from 1 of 3 independent experiments performed with similar results. Data points are shown as mean  $\pm$  SD; Two-tailed t-tests were used to determine statistical significance (\* $P$ <0.05, \*\* $P$ <0.01, \*\*\* $P$ <0.001).

**A**

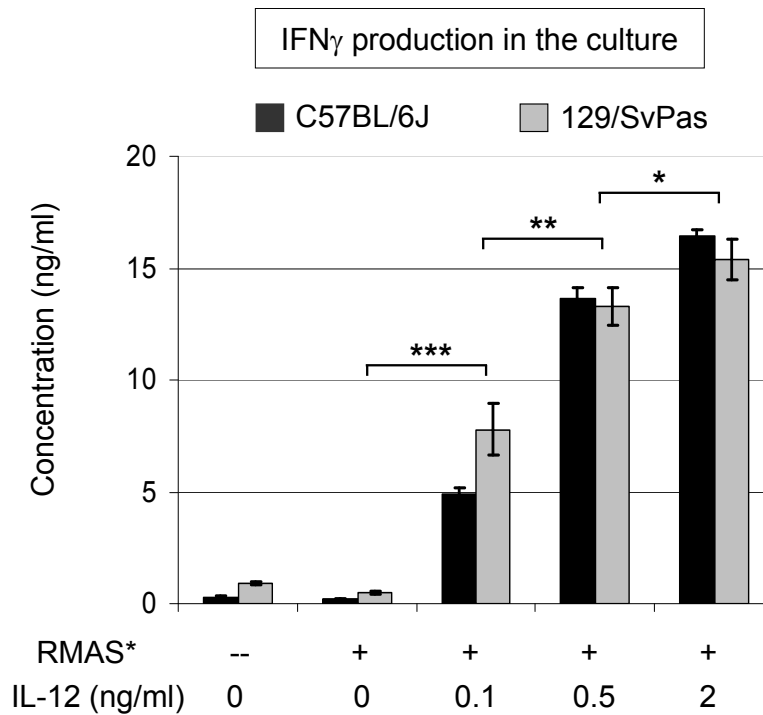

**B**

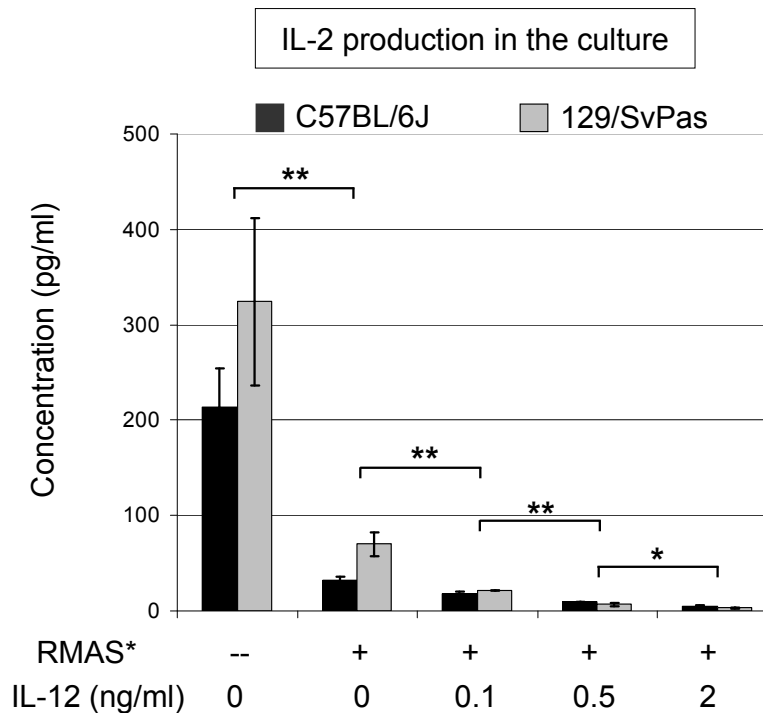

**Figure S6. IL-12 treatment enhances tumor clearance more efficiently than Treg cell depletion *in vivo*.** Four days prior to RMAS injection, 129/SvJ WT mice received a single IP injection of 400  $\mu\text{g}$  PC61 CD25 antibody to deplete Treg cells (TrD), or were injected with an isotype control antibody. From day 0 to day 7 after IP injection of  $2 \times 10^6$  luciferase-expressing RMAS cells, these mice were injected IP daily with equal volumes of PBS, while a third set of mice received 100 ng of IL-12 IP daily. Bioluminescence imaging was performed to monitor tumor burden. Representative images (A) and summary data (B) of 2 independent experiments are shown. Data points are shown as mean  $\pm$  SD; Two-tailed t-tests were used to determine statistical significance (\* $P < 0.05$ , \*\* $P < 0.01$ , \*\*\* $P < 0.001$ ).

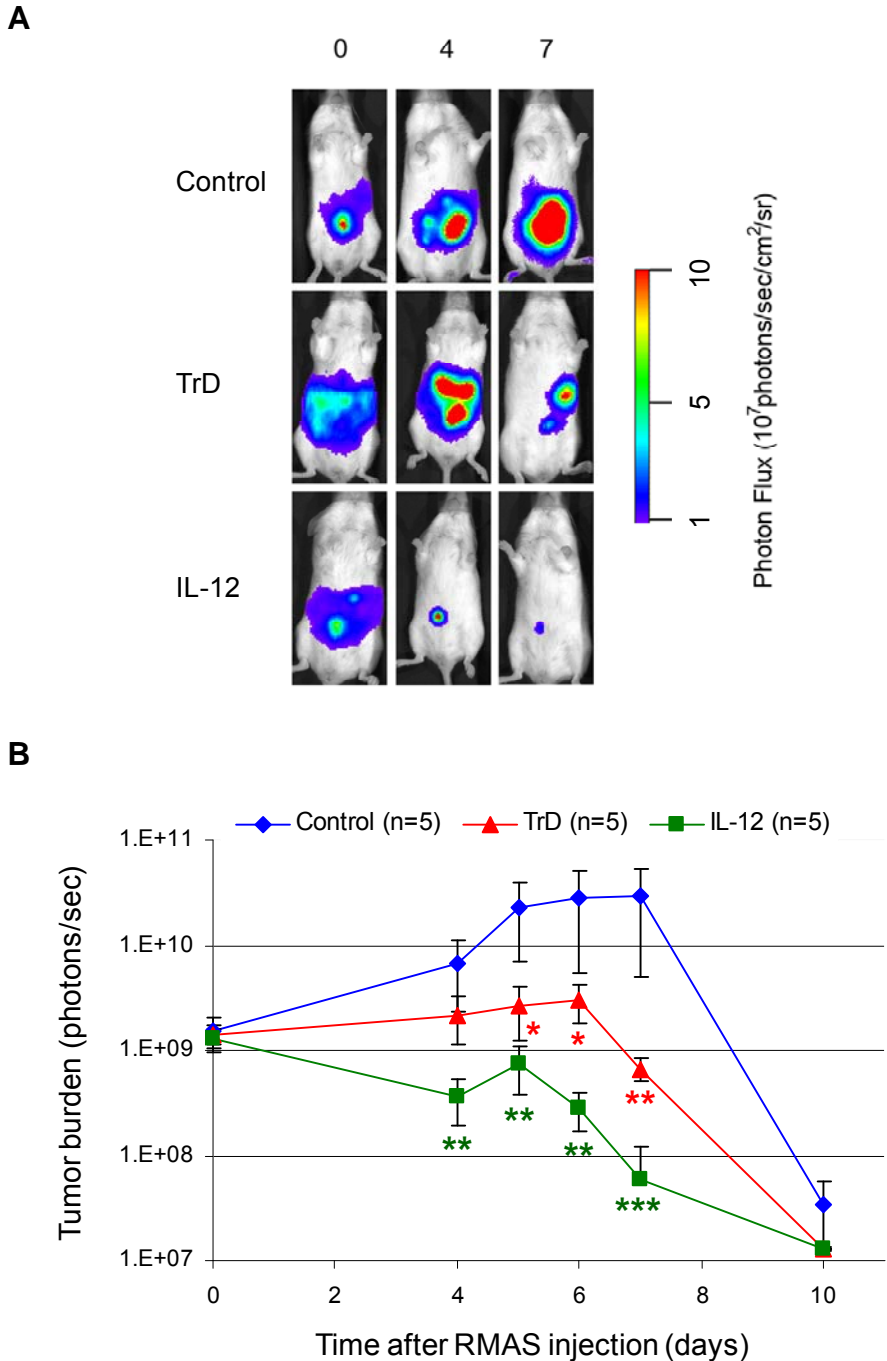

**Figure S7. IL-12 treatment does not cause significant cell death in the Treg cell compartment.**

Naïve, unfractionated splenocytes from Foxp3-GFP knock-in mice were co-cultured with irradiated RMA5 cells as described in the Materials and Methods for 4 days. Lymphocytes were harvested from the co-cultures and stained with primary-conjugated antibody against CD4 and 7-AAD to assess cell death in the GFP+ Treg and GFP- non-Treg compartments by flow cytometry. Shown here are representative data from two independent experiments.

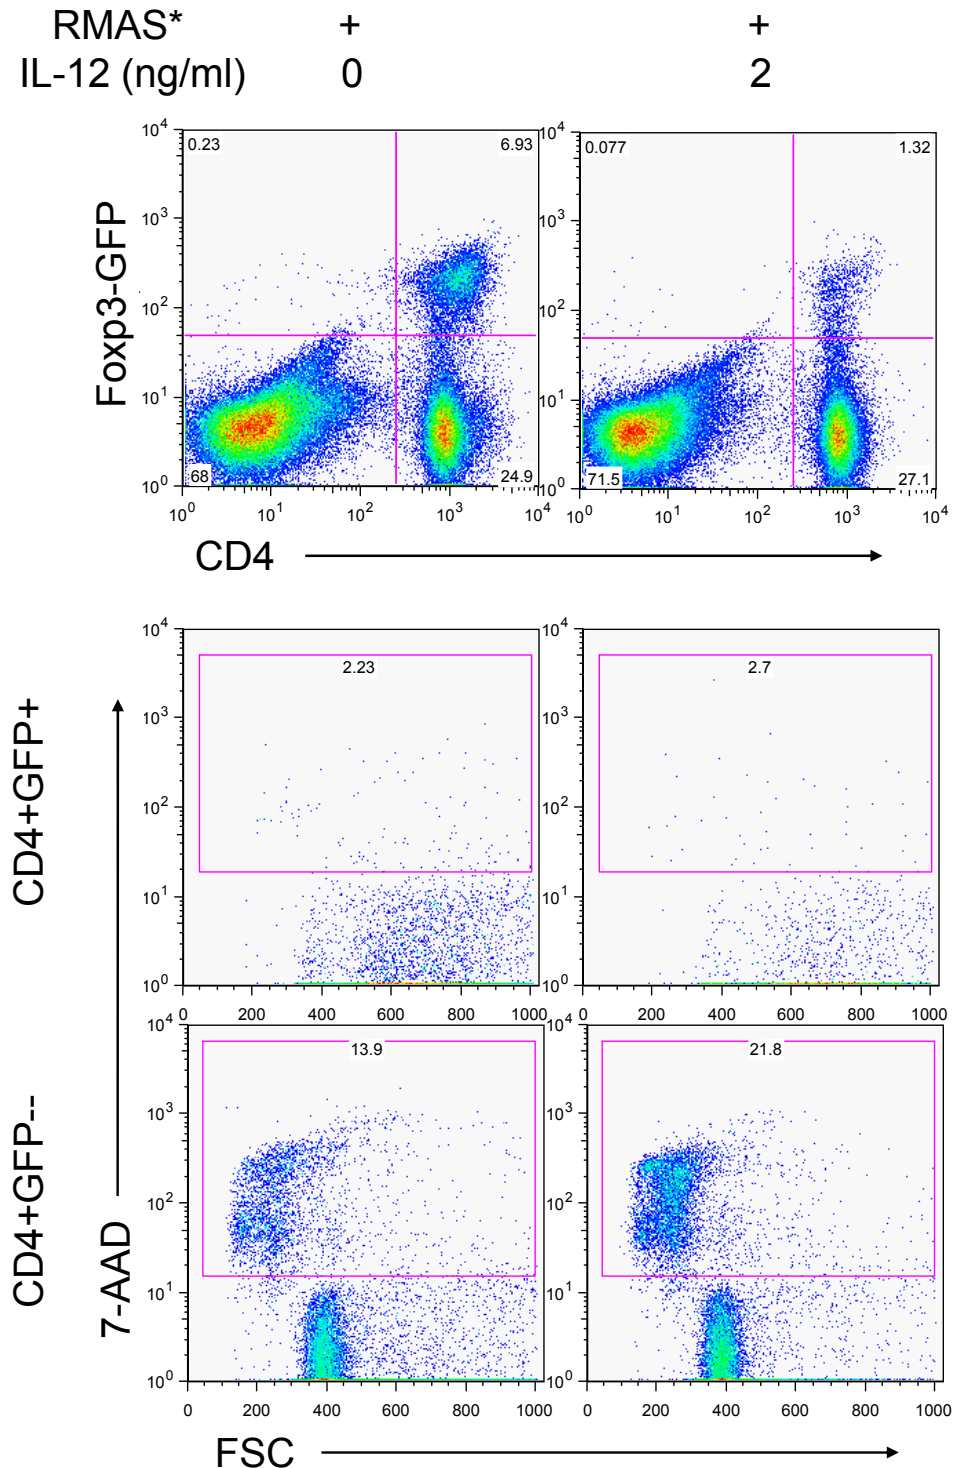

**Figure S8. Gene expression profiles of naïve versus tumor-associated Treg cells.**

Naïve, Spleen<sup>T</sup>, and Ascites Treg cells were purified and Affymetrix MOE430v2 arrays were performed as described in Figure S3. RMA normalization was performed for all microarray data. 2-group comparison (t-test) of Ascites vs. Naïve samples, with multiple test corrections (adjusted p-value/FDR(false discovery rate) = q-value) was performed. **A.** Shown is a heat map of 419 probesets with  $q < 0.005$  and linear fold change  $\geq 2$  (Ascites:Naïve) **B.** Shown is a heat map of 114 probesets with  $q < 0.005$  and linear fold change  $\leq 0.5$  (Ascites:Naïve). Red indicates relatively increased expression; green indicates relatively decreased expression. Gene titles and fold changes of the 419 up-regulated and 114 down-regulated probesets are shown in the Supplement Table on next page.

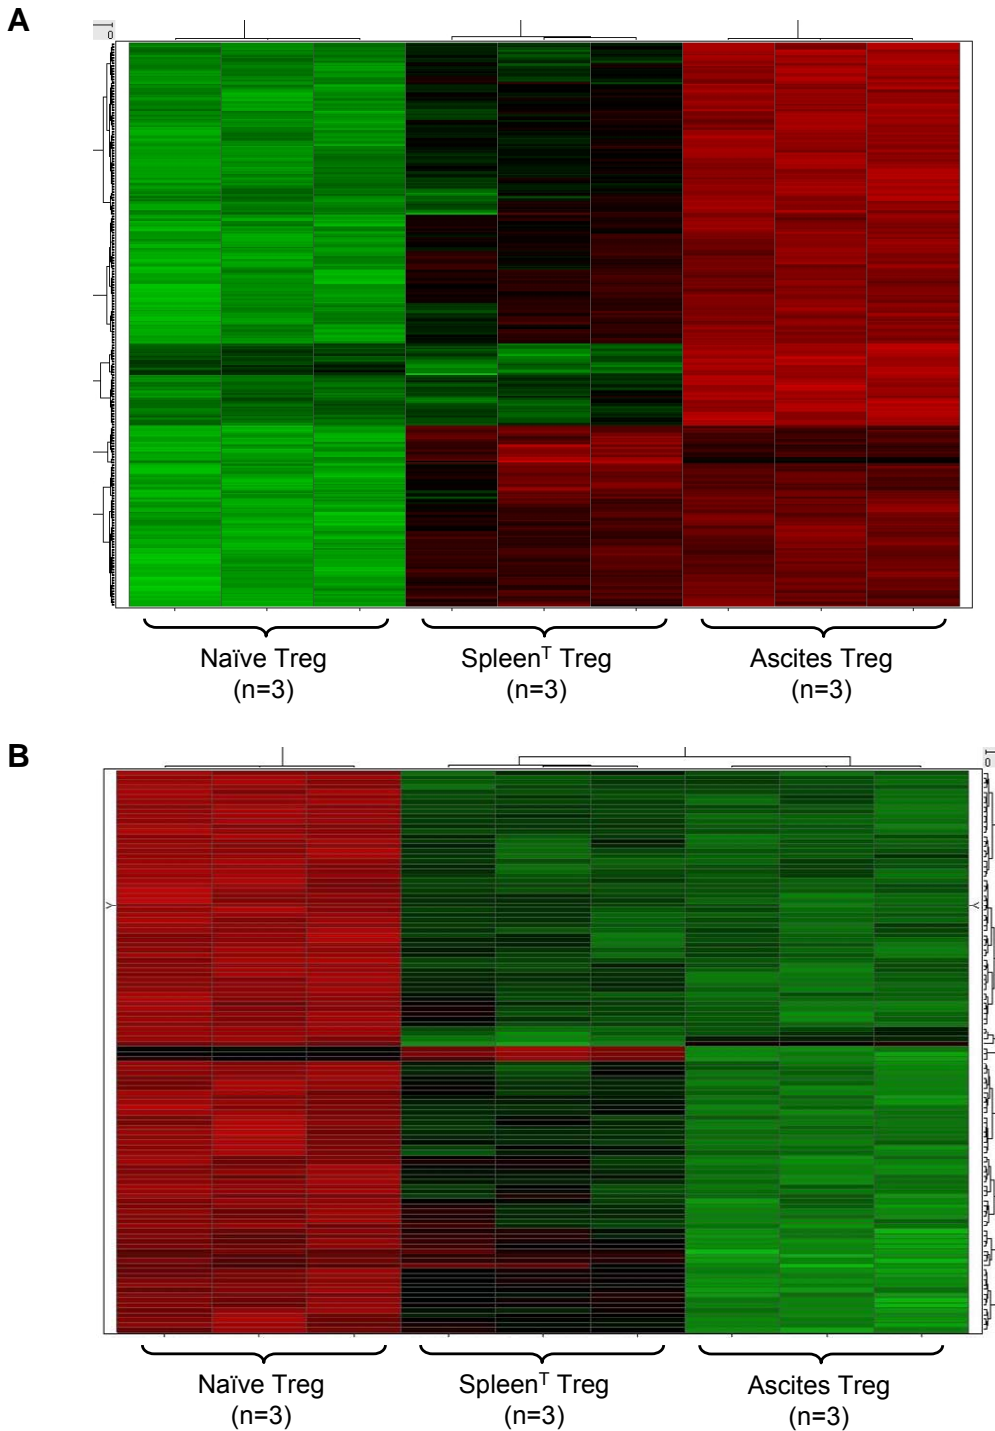



**Supplemental Table. Gene titles and fold changes of the 419 up-regulated and 114 down-regulated probesets.** Naïve, Spleen<sup>T</sup>, and Ascites Treg cells were purified and Affymetrix MOE430v2 arrays were performed as described in Figure S3. Data analysis was performed as described in Figure S8. Shown here are the 419 probesets with  $q < 0.005$  and linear fold change  $\geq 2$  (Ascites:Naïve) and the 114 probesets with  $q < 0.005$  and linear fold change  $\leq 0.5$  (Ascites:Naïve). The GO annotations for these probesets are shown in the attached supplemental Excel file. The complete set of Treg gene expression data is deposited in Gene Expression Omnibus (GEO) microarray database (<http://www.ncbi.nlm.nih.gov/geo/>), accession number GSE13409.

| Figure S5<br>Probeset<br>ID | Gene Title                                                                      | Gene<br>Symbol         | Ascites<br>Average<br>(linear) | Naive<br>Average<br>(linear) | Linear<br>Fold<br>Change<br>(Ascites:<br>Naive) | q-value  |
|-----------------------------|---------------------------------------------------------------------------------|------------------------|--------------------------------|------------------------------|-------------------------------------------------|----------|
| 1436996_x_at                | lysozyme 1                                                                      | Lyz1                   | 4913.833753                    | 26.46725492                  | 185.6571                                        | 0.003202 |
| 1425923_at                  | v-myc myelocytomatosis viral related<br>oncogene, neuroblastoma derived (avian) | Mycn                   | 6107.219573                    | 89.46842204                  | 68.26117                                        | 0.004591 |
| 1419060_at                  | granzyme B                                                                      | Gzmb                   | 7644.465941                    | 194.8585376                  | 39.23085                                        | 0.004591 |
| 1448226_at                  | ribonucleotide reductase M2                                                     | Rrm2                   | 1941.020985                    | 51.67782095                  | 37.56004                                        | 0.004149 |
| 1421811_at                  | similar to thrombospondin 1 ///<br>thrombospondin 1                             | LOC640441<br>/// Thbs1 | 405.1540261                    | 11.40715145                  | 35.51755                                        | 0.004679 |
| 1426642_at                  | fibronectin 1                                                                   | Fn1                    | 1328.424021                    | 44.7807463                   | 29.66507                                        | 0.003976 |
| 1424046_at                  | budding uninhibited by benzimidazoles 1<br>homolog (S. cerevisiae)              | Bub1                   | 419.805328                     | 14.77783821                  | 28.40776                                        | 0.004149 |
| 1429295_s_at                | thyroid hormone receptor interactor 13                                          | Trip13                 | 1103.21378                     | 40.77774241                  | 27.05431                                        | 0.004458 |
| 1417019_a_at                | cell division cycle 6 homolog (S.<br>cerevisiae)                                | Cdc6                   | 763.9670823                    | 29.08580509                  | 26.26598                                        | 0.002488 |
| 1415810_at                  | ubiquitin-like, containing PHD and RING<br>finger domains, 1                    | Uhrf1                  | 1810.95293                     | 69.44633563                  | 26.07701                                        | 0.003202 |
| 1428304_at                  | establishment of cohesion 1 homolog 2<br>(S. cerevisiae)                        | Esco2                  | 206.5904852                    | 8.006804977                  | 25.80186                                        | 0.004405 |
| 1426774_at                  | poly (ADP-ribose) polymerase family,<br>member 12                               | Parp12                 | 1007.350479                    | 40.99842738                  | 24.57047                                        | 0.004701 |
| 1424727_at                  | chemokine (C-C motif) receptor 5                                                | Ccr5                   | 937.4231849                    | 39.9458392                   | 23.46735                                        | 0.003166 |
| 1434437_x_at                | ribonucleotide reductase M2                                                     | Rrm2                   | 2815.547939                    | 124.3066786                  | 22.65001                                        | 0.004304 |
| 1416343_a_at                | lysosomal-associated membrane protein 2                                         | Lamp2                  | 297.6720592                    | 13.16744322                  | 22.60667                                        | 0.002488 |
| 1422430_at                  | fidgetin-like 1                                                                 | Figl1                  | 646.8347305                    | 29.77094957                  | 21.72704                                        | 0.004461 |
| 1421186_at                  | chemokine (C-C motif) receptor 2                                                | Ccr2                   | 2943.873574                    | 136.8043221                  | 21.51886                                        | 0.004149 |
| 1454694_a_at                | topoisomerase (DNA) II alpha                                                    | Top2a                  | 3435.807121                    | 159.9673132                  | 21.47818                                        | 0.004304 |
| 1450194_a_at                | myeloblastosis oncogene                                                         | Myb                    | 898.4804693                    | 42.55706248                  | 21.11237                                        | 0.004591 |
| 1417266_at                  | chemokine (C-C motif) ligand 6                                                  | Ccl6                   | 641.3686382                    | 32.10538365                  | 19.97698                                        | 0.004304 |
| 1416802_a_at                | cell division cycle associated 5                                                | Cdca5                  | 938.5848305                    | 47.09830821                  | 19.92821                                        | 0.004304 |
| 1417719_at                  | sin3 associated polypeptide                                                     | Sap30                  | 706.4482151                    | 36.90667851                  | 19.14147                                        | 0.004304 |
| 1424278_a_at                | baculoviral IAP repeat-containing 5                                             | Birc5                  | 478.0938376                    | 25.19536876                  | 18.97546                                        | 0.004304 |
| 1417910_at                  | cyclin A2                                                                       | Ccna2                  | 572.4847027                    | 30.88982944                  | 18.53311                                        | 0.004922 |
| 1436847_s_at                | cell division cycle associated 8                                                | Cdca8                  | 1898.397864                    | 105.256827                   | 18.03586                                        | 0.004963 |
| 1451313_a_at                | RIKEN cDNA 1110067D22 gene                                                      | 1110067D2<br>2Rik      | 526.4392816                    | 29.51923304                  | 17.83377                                        | 0.003976 |
| 1436203_a_at                | RIKEN cDNA 1110059G02 gene                                                      | 1110059G0<br>2Rik      | 787.6385971                    | 45.5234082                   | 17.30184                                        | 0.003976 |
| 1452912_at                  | defective in sister chromatid cohesion 1<br>homolog (S. cerevisiae)             | Dscc1                  | 348.389339                     | 20.21419248                  | 17.23489                                        | 0.004864 |
| 1417898_a_at                | granzyme A                                                                      | Gzma                   | 718.8747729                    | 43.26944367                  | 16.61391                                        | 0.004591 |
| 1448466_at                  | cell division cycle associated 5                                                | Cdca5                  | 332.3815902                    | 20.33382893                  | 16.34624                                        | 0.004405 |
| 1448627_s_at                | PDZ binding kinase                                                              | Pbk                    | 835.7224029                    | 53.70768628                  | 15.56057                                        | 0.004304 |

|              |                                                                       |                                 |             |             |          |          |
|--------------|-----------------------------------------------------------------------|---------------------------------|-------------|-------------|----------|----------|
| 1418322_at   | cAMP responsive element modulator                                     | Crem                            | 1162.821014 | 75.63191972 | 15.37474 | 0.004681 |
| 1424128_x_at | aurora kinase B                                                       | Aurkb                           | 365.6940475 | 24.14796985 | 15.14388 | 0.004681 |
| 1419082_at   | serine (or cysteine) peptidase inhibitor, clade B, member 2           | Serpnb2                         | 199.5043878 | 13.22971429 | 15.08002 | 0.004405 |
| 1448213_at   | annexin A1                                                            | Anxa1                           | 812.3400705 | 54.13000689 | 15.0072  | 0.004681 |
| 1451246_s_at | aurora kinase B                                                       | Aurkb                           | 339.1555599 | 22.64294962 | 14.97842 | 0.004581 |
| 1428104_at   | TPX2, microtubule-associated protein homolog (Xenopus laevis)         | Tpx2                            | 425.6301876 | 28.44454305 | 14.96351 | 0.004663 |
| 1420338_at   | arachidonate 15-lipoxygenase                                          | Alox15                          | 376.5401772 | 25.29867637 | 14.88379 | 0.004304 |
| 1435327_at   | lysophosphatidylglycerol acyltransferase 1                            | Lpgat1                          | 394.2426368 | 26.53031684 | 14.86008 | 0.002697 |
| 1417541_at   | helicase, lymphoid specific                                           | Hells                           | 612.0489938 | 41.69695133 | 14.67851 | 0.004149 |
| 1417926_at   | non-SMC condensin II complex, subunit G2                              | Ncapg2                          | 490.5704985 | 33.88786088 | 14.47629 | 0.004174 |
| 1427707_a_at | ScI/Tal1 interrupting locus                                           | Stil                            | 226.5182271 | 15.74618032 | 14.3856  | 0.004701 |
| 1449037_at   | cAMP responsive element modulator                                     | Crem                            | 2089.439108 | 146.8585381 | 14.22756 | 0.004591 |
| 1421855_at   | fibrinogen-like protein 2                                             | Fgl2                            | 782.3588427 | 55.1602338  | 14.18339 | 0.004681 |
| 1416579_a_at | epithelial cell adhesion molecule                                     | Epcam                           | 1288.767825 | 90.95388349 | 14.16946 | 0.004591 |
| 1434695_at   | denticleless homolog (Drosophila)                                     | Dtl                             | 603.3020468 | 43.13518784 | 13.98631 | 0.004304 |
| 1416120_at   | ribonucleotide reductase M2                                           | Rrm2                            | 909.0694254 | 66.81622947 | 13.60552 | 0.003976 |
| 1436325_at   | RAR-related orphan receptor alpha                                     | Rora                            | 1032.230894 | 77.49439167 | 13.32007 | 0.004304 |
| 1447363_s_at | budding uninhibited by benzimidazoles 1 homolog, beta (S. cerevisiae) | Bub1b                           | 518.4352484 | 40.19525598 | 12.89792 | 0.004922 |
| 1434427_a_at | ring finger protein 157                                               | Rnf157                          | 979.7772615 | 76.69921994 | 12.77428 | 0.003976 |
| 1416076_at   | cyclin B1 /// predicted gene, EG434175 /// predicted gene, EG667005   | Ccnb1 /// EG434175 /// EG667005 | 434.5856317 | 34.05378687 | 12.76174 | 0.004965 |
| 1440408_at   | RIKEN cDNA B830008J18 gene                                            | B830008J18Rik                   | 391.1875558 | 31.33927717 | 12.48234 | 0.004304 |
| 1448314_at   | cell division cycle 2 homolog A (S. pombe)                            | Cdc2a                           | 485.2092801 | 39.27746732 | 12.35337 | 0.004405 |
| 1428369_s_at | Rho GTPase activating protein 21                                      | Arhgap21                        | 425.5436559 | 34.48076792 | 12.34148 | 0.003057 |
| 1426817_at   | antigen identified by monoclonal antibody Ki 67                       | Mki67                           | 4152.41043  | 338.4651146 | 12.26836 | 0.004304 |
| 1424176_a_at | annexin A4                                                            | Anxa4                           | 396.4018815 | 32.80142682 | 12.0849  | 0.004701 |
| 1416318_at   | serine (or cysteine) peptidase inhibitor, clade B, member 1a          | Serpnb1a                        | 394.2080243 | 32.75674273 | 12.03441 | 0.004591 |
| 1427615_at   | integrin alpha 4                                                      | Itga4                           | 159.5056075 | 13.29919177 | 11.99363 | 0.004048 |
| 1450744_at   | elongation factor RNA polymerase II 2                                 | Ell2                            | 642.6116534 | 54.10424925 | 11.87729 | 0.004591 |
| 1435306_a_at | kinesin family member 11                                              | Kif11                           | 170.7434786 | 14.40492256 | 11.85313 | 0.003976 |
| 1450920_at   | cyclin B2                                                             | Ccnb2                           | 995.6466378 | 84.89807871 | 11.72755 | 0.004911 |
| 1438288_x_at | RIKEN cDNA 1110059G02 gene                                            | 1110059G02Rik                   | 375.2816659 | 32.22987452 | 11.64391 | 0.004174 |
| 1428094_at   | lysosomal-associated membrane protein 2                               | Lamp2                           | 2095.04667  | 180.8838758 | 11.58227 | 0.004461 |
| 1435264_at   | elastin microfibril interfacier 2                                     | Emilin2                         | 481.9033433 | 41.8827229  | 11.50602 | 0.00423  |
| 1424629_at   | breast cancer 1                                                       | Brca1                           | 433.7460071 | 37.82225127 | 11.46801 | 0.004304 |
| 1448167_at   | interferon gamma receptor 1                                           | Ifngr1                          | 9109.145434 | 806.1810156 | 11.29913 | 0.004461 |
| 1424895_at   | G-protein signalling modulator 2 (AGS3-like, C. elegans)              | Gpsm2                           | 400.6874    | 36.07531283 | 11.10697 | 0.004304 |
| 1416698_a_at | CDC28 protein kinase 1b                                               | Cks1b                           | 3784.446683 | 341.98123   | 11.06624 | 0.004304 |
| 1452011_a_at | UDP-glucuronate decarboxylase 1                                       | Uxs1                            | 528.1424644 | 47.81009388 | 11.04667 | 0.004681 |
| 1417063_at   | complement component 1, q subcomponent, beta polypeptide              | C1qb                            | 197.7334768 | 17.97711988 | 10.99917 | 0.003976 |
| 1455030_at   | protein tyrosine phosphatase, receptor type, J                        | Ptpnj                           | 142.5182964 | 13.03079621 | 10.93704 | 0.004681 |
| 1419943_s_at | cyclin B1                                                             | Ccnb1                           | 465.1342395 | 43.49698001 | 10.69348 | 0.004174 |
| 1450484_a_at | cytidine monophosphate (UMP-CMP) kinase 2, mitochondrial              | Cmpk2                           | 448.1661885 | 42.12398444 | 10.63922 | 0.004304 |
| 1419042_at   | interferon inducible GTPase 1                                         | Ilgp1                           | 2259.36243  | 216.675166  | 10.42742 | 0.004591 |
| 1434316_at   | chondroitin sulfate synthase 1 /// similar to mKIAA0990 protein       | Chsy1 /// LOC100047             | 902.8421729 | 86.97145108 | 10.3809  | 0.004304 |

167

|              |                                                                                  |                         |             |             |          |          |
|--------------|----------------------------------------------------------------------------------|-------------------------|-------------|-------------|----------|----------|
| 1424704_at   | runt related transcription factor 2                                              | Runx2                   | 1358.312767 | 131.3434094 | 10.34169 | 0.002608 |
| 1423804_a_at | isopentenyl-diphosphate delta isomerase                                          | Idi1                    | 896.6244311 | 87.23347764 | 10.27844 | 0.004304 |
| 1449708_s_at | checkpoint kinase 1 homolog (S. pombe)                                           | Chek1                   | 382.6097956 | 37.45491995 | 10.21521 | 0.003202 |
| 1418264_at   | centromere protein K                                                             | Cenpk                   | 223.8114446 | 22.03314193 | 10.15795 | 0.004922 |
| 1443481_at   | epsilon-tubulin 1                                                                | Tube1                   | 155.9139999 | 15.47552735 | 10.07487 | 0.004343 |
| 1436004_at   | ubiquitin specific peptidase 27, X chromosome                                    | Usp27x                  | 322.1353853 | 32.05453703 | 10.0496  | 0.002608 |
| 1424083_at   | ROD1 regulator of differentiation 1 (S. pombe)                                   | Rod1                    | 547.8422291 | 55.13347638 | 9.936653 | 0.00477  |
| 1450862_at   | RAD54 like (S. cerevisiae)                                                       | Rad54l                  | 443.7582097 | 45.66594131 | 9.717487 | 0.004864 |
| 1429658_a_at | structural maintenance of chromosomes 2                                          | Smc2                    | 360.8728174 | 37.51502636 | 9.619421 | 0.00477  |
| 1420897_at   | synaptosomal-associated protein 23                                               | Snap23                  | 1089.378814 | 114.5282744 | 9.511877 | 0.004304 |
| 1449207_a_at | kinesin family member 20A                                                        | Kif20a                  | 199.4592195 | 21.40515929 | 9.318278 | 0.004343 |
| 1421968_a_at | non imprinted in Prader-Willi/Angelman syndrome 2 homolog (human)                | Nipa2                   | 594.1733136 | 64.87571672 | 9.15864  | 0.003665 |
| 1426205_at   | similar to protein phosphatase 1 /// protein phosphatase 1, catalytic subunit, b | LOC100044953 /// Ppp1cb | 3336.454236 | 366.1709001 | 9.111741 | 0.004688 |
| 1433428_x_at | transglutaminase 2, C polypeptide                                                | Tgm2                    | 228.8782666 | 25.25901834 | 9.061249 | 0.004304 |
| 1433696_at   | hematological and neurological expressed 1-like                                  | Hn1l                    | 248.964575  | 27.58566141 | 9.025144 | 0.004149 |
| 1434951_at   | armadillo repeat containing 8                                                    | Armc8                   | 175.6484051 | 19.49037576 | 9.012058 | 0.004701 |
| 1418203_at   | phorbol-12-myristate-13-acetate-induced protein 1                                | Pmaip1                  | 755.2113657 | 84.5482702  | 8.93231  | 0.004461 |
| 1428433_at   | homeodomain interacting protein kinase 2                                         | Hipk2                   | 2536.517385 | 285.7804336 | 8.875756 | 0.003665 |
| 1434503_s_at | lysosomal-associated membrane protein 2                                          | Lamp2                   | 3684.619682 | 427.4780897 | 8.619435 | 0.004304 |
| 1433445_x_at | 3-hydroxy-3-methylglutaryl-Coenzyme A synthase 1 /// similar to Hmgcs1 protein   | Hmgcs1 /// LOC100040592 | 2120.173577 | 246.1351119 | 8.613861 | 0.004701 |
| 1430569_at   | tetratricopeptide repeat domain 9C                                               | Ttc9c                   | 119.2492735 | 13.85613833 | 8.606242 | 0.004922 |
| 1450871_a_at | branched chain aminotransferase 1, cytosolic                                     | Bcat1                   | 303.9963096 | 35.81329447 | 8.488365 | 0.004591 |
| 1439943_at   | vacuolar protein sorting 54 (yeast)                                              | Vps54                   | 688.3030058 | 81.65711357 | 8.429186 | 0.004405 |
| 1435575_at   | kinetochore associated 1                                                         | Kntc1                   | 320.6057893 | 38.04144124 | 8.427803 | 0.004922 |
| 1436058_at   | radical S-adenosyl methionine domain containing 2                                | Rsad2                   | 626.5344378 | 74.60721931 | 8.397772 | 0.00424  |
| 1452534_a_at | high mobility group box 2                                                        | Hmgb2                   | 2583.65908  | 308.5919605 | 8.372412 | 0.003976 |
| 1420731_a_at | cysteine and glycine-rich protein 2                                              | Csrp2                   | 429.6803525 | 51.97694733 | 8.266749 | 0.004343 |
| 1450677_at   | checkpoint kinase 1 homolog (S. pombe)                                           | Chek1                   | 195.5147083 | 23.78538271 | 8.219952 | 0.004304 |
| 1429095_at   | centromere protein P                                                             | Cenpp                   | 203.9375087 | 24.8664732  | 8.201304 | 0.004174 |
| 1452040_a_at | cell division cycle associated 3                                                 | Cdca3                   | 318.8107943 | 39.15957856 | 8.141323 | 0.004681 |
| 1435597_at   | ATPase family, AAA domain containing 5                                           | Atad5                   | 546.953105  | 67.44969433 | 8.109052 | 0.004864 |
| 1452007_at   | vesicle-associated membrane protein 7                                            | Vamp7                   | 228.3505836 | 28.43107347 | 8.031726 | 0.004304 |
| 1421317_x_at | myeloblastosis oncogene                                                          | Myb                     | 2594.606429 | 323.5780645 | 8.018487 | 0.004701 |
| 1433444_at   | 3-hydroxy-3-methylglutaryl-Coenzyme A synthase 1 /// similar to Hmgcs1 protein   | Hmgcs1 /// LOC100040592 | 1801.105116 | 224.948354  | 8.006749 | 0.004922 |
| 1423971_at   | THO complex 3                                                                    | Thoc3                   | 452.95063   | 56.70038659 | 7.988493 | 0.00477  |
| 1417190_at   | nicotinamide phosphoribosyltransferase                                           | Nampt                   | 932.5194458 | 116.7374244 | 7.988179 | 0.004304 |
| 1450646_at   | cytochrome P450, family 51                                                       | Cyp51                   | 832.334715  | 105.228377  | 7.909793 | 0.004304 |
| 1452608_at   | c-myc binding protein                                                            | Mycbp                   | 457.2005514 | 58.04044464 | 7.877275 | 0.004681 |
| 1417696_at   | sterol O-acyltransferase 1                                                       | Soat1                   | 460.8701972 | 60.23583027 | 7.651097 | 0.004304 |
| 1434278_at   | X-linked myotubular myopathy gene 1                                              | Mtm1                    | 469.109205  | 61.5548232  | 7.620998 | 0.00477  |
| 1425521_at   | polyadenylate binding protein-interacting protein 1                              | Paip1                   | 354.7822445 | 48.83724797 | 7.264583 | 0.003665 |
| 1417400_at   | retinoic acid induced 14                                                         | Rai14                   | 252.3379411 | 35.07416046 | 7.194411 | 0.004304 |
| 1435975_at   | DENN/MADD domain containing 4A                                                   | Dennd4a                 | 716.718773  | 99.6991984  | 7.188812 | 0.004591 |
| 1416529_at   | epithelial membrane protein 1                                                    | Emp1                    | 973.7133646 | 136.0217298 | 7.158513 | 0.003976 |

|              |                                                                                  |                                 |             |             |          |          |
|--------------|----------------------------------------------------------------------------------|---------------------------------|-------------|-------------|----------|----------|
| 1423774_a_at | protein regulator of cytokinesis 1                                               | Prc1                            | 271.6013173 | 38.2454619  | 7.101531 | 0.004304 |
| 1436456_at   | solute carrier family 38, member 9                                               | Slc38a9                         | 422.8933313 | 59.9341624  | 7.055965 | 0.004304 |
| 1428487_s_at | coenzyme Q10 homolog B (S. cerevisiae)                                           | Coq10b                          | 444.3614953 | 63.21200482 | 7.029701 | 0.004245 |
| 1457070_at   | ---                                                                              | ---                             | 174.0848284 | 25.00850076 | 6.961026 | 0.004174 |
| 1425537_at   | protein phosphatase 1A, magnesium dependent, alpha isoform                       | Ppm1a                           | 229.1110662 | 33.44843177 | 6.84968  | 0.004304 |
| 1443602_at   | ---                                                                              | ---                             | 2522.898878 | 368.3738054 | 6.848747 | 0.00477  |
| 1450724_at   | family with sequence similarity 126, member A                                    | Fam126a                         | 1053.786339 | 154.580372  | 6.817077 | 0.004591 |
| 1440866_at   | eukaryotic translation initiation factor 2-alpha kinase 2                        | Eif2ak2                         | 91.77504426 | 13.50994597 | 6.793147 | 0.002783 |
| 1438852_x_at | minichromosome maintenance deficient 6 (MIS5 homolog, S. pombe) (S. cerevisiae)  | Mcm6                            | 1944.88167  | 289.6024505 | 6.715695 | 0.00477  |
| 1448191_at   | polo-like kinase 1 (Drosophila)                                                  | Plk1                            | 374.9791753 | 56.30820801 | 6.659405 | 0.004405 |
| 1437743_at   | AE binding protein 2                                                             | Aebp2                           | 1050.902662 | 157.8444801 | 6.657836 | 0.00424  |
| 1434294_at   | ---                                                                              | ---                             | 242.7476188 | 36.64700349 | 6.623942 | 0.004591 |
| 1423463_a_at | DNA segment, Chr 2, ERATO Doi 750, expressed                                     | D2Erd750e                       | 84.67260285 | 12.80894723 | 6.610426 | 0.004304 |
| 1448061_at   | macrophage scavenger receptor 1                                                  | Msr1                            | 121.1426725 | 18.3596502  | 6.59831  | 0.00424  |
| 1419552_at   | enoyl Coenzyme A hydratase domain containing 1                                   | Echdc1                          | 288.7866018 | 43.90327527 | 6.577792 | 0.003202 |
| 1435679_at   | optineurin                                                                       | Optn                            | 198.1153242 | 30.28119007 | 6.542521 | 0.004591 |
| 1428281_at   | TruB pseudouridine (psi) synthase homolog 1 (E. coli)                            | Trub1                           | 388.8500193 | 59.56721759 | 6.52792  | 0.004361 |
| 1453024_at   | WD repeat domain 37                                                              | Wdr37                           | 278.7684214 | 42.74202435 | 6.522116 | 0.004343 |
| 1433739_at   | nucleolar protein 10                                                             | Nol10                           | 105.601023  | 16.20312299 | 6.517325 | 0.00424  |
| 1427940_s_at | c-myc binding protein                                                            | Mycbp                           | 114.6606591 | 17.74113822 | 6.462982 | 0.004405 |
| 1437495_at   | similar to zinc finger, X-linked, duplicated B /// membrane-bound transcription  | LOC100047187 /// Mbtps2 /// Yy2 | 331.2040873 | 51.40024508 | 6.443629 | 0.004922 |
| 1448710_at   | chemokine (C-X-C motif) receptor 4                                               | Cxcr4                           | 1489.831374 | 234.7351367 | 6.346861 | 0.004461 |
| 1424711_at   | transmembrane protein 2                                                          | Tmem2                           | 97.60095325 | 15.47506252 | 6.306983 | 0.004922 |
| 1428336_at   | 1-acylglycerol-3-phosphate O-acyltransferase 4 (lysophosphatidic acid acyltransf | Agpat4                          | 608.0108815 | 96.79607655 | 6.281359 | 0.004343 |
| 1442350_at   | ---                                                                              | ---                             | 134.0109118 | 21.74914326 | 6.161664 | 0.00477  |
| 1449095_at   | vacuolar protein sorting 54 (yeast)                                              | Vps54                           | 3734.933049 | 609.4384302 | 6.128483 | 0.003976 |
| 1455990_at   | kinesin family member 23                                                         | Kif23                           | 562.0442856 | 91.73709599 | 6.126685 | 0.00477  |
| 1447217_at   | ubiquitin-like, containing PHD and RING finger domains 2                         | Uhrf2                           | 452.3032859 | 74.11601112 | 6.102639 | 0.004304 |
| 1416035_at   | hypoxia inducible factor 1, alpha subunit                                        | Hif1a                           | 1903.052966 | 314.9727773 | 6.04196  | 0.004405 |
| 1452352_at   | cytotoxic T lymphocyte-associated protein 2 beta                                 | Ctla2b                          | 97.93368961 | 16.22140263 | 6.037313 | 0.004304 |
| 1448721_at   | DNA segment, Chr 1, ERATO Doi 622, expressed                                     | D1Erd622e                       | 380.021351  | 63.01922031 | 6.030245 | 0.004174 |
| 1419598_at   | membrane-spanning 4-domains, subfamily A, member 6D                              | Ms4a6d                          | 87.86926168 | 14.73086252 | 5.964977 | 0.004922 |
| 1453035_at   | limb and neural patterns                                                         | Lnp                             | 182.7574828 | 30.70553142 | 5.95194  | 0.004174 |
| 1418507_s_at | suppressor of cytokine signaling 2                                               | Socs2                           | 1424.263139 | 240.9010158 | 5.912234 | 0.004256 |
| 1418152_at   | nucleosome binding protein 1                                                     | Nsbp1                           | 1603.675652 | 272.9135093 | 5.876131 | 0.00477  |
| 1441955_s_at | similar to poly(A) binding protein interacting protein 1 /// polyadenylate bindi | LOC676674 /// Paip1             | 104.6880771 | 17.84766375 | 5.865646 | 0.004304 |
| 1438750_at   | Alpha thalassemia/mental retardation syndrome X-linked homolog (human) (Atrx), m | Atrx                            | 260.7102209 | 44.46279286 | 5.863559 | 0.003976 |
| 1429058_at   | transmembrane protein 107                                                        | Tmem107                         | 379.2573509 | 64.94965692 | 5.839251 | 0.004922 |
| 1423347_at   | SEC23A (S. cerevisiae)                                                           | Sec23a                          | 923.1641141 | 158.9798377 | 5.8068   | 0.002931 |
| 1426240_at   | chromatin modifying protein 4B /// similar to zinc finger protein 341            | Chmp4b /// LOC674706            | 1781.611014 | 307.0777133 | 5.801825 | 0.004591 |
| 1433585_at   | transportin 1                                                                    | Tnpo1                           | 1074.718666 | 185.8296201 | 5.783355 | 0.00424  |

|              |                                                                                  |                                                                                             |             |             |          |          |
|--------------|----------------------------------------------------------------------------------|---------------------------------------------------------------------------------------------|-------------|-------------|----------|----------|
| 1427061_at   | retinoblastoma binding protein 8                                                 | Rbbp8                                                                                       | 1281.425006 | 225.0689662 | 5.693477 | 0.004405 |
| 1455486_at   | protein inhibitor of activated STAT 1                                            | Pias1                                                                                       | 349.932617  | 61.51003962 | 5.689033 | 0.004963 |
| 1428796_at   | bobby sox homolog (Drosophila)                                                   | Bbx                                                                                         | 418.6768484 | 73.88041167 | 5.666953 | 0.004174 |
| 1420028_s_at | similar to DNA replication licensing factor MCM3 (DNA polymerase alpha holoenzym | LOC100045677 ///<br>Mcm3                                                                    | 1939.317543 | 344.2612523 | 5.633273 | 0.004174 |
| 1437539_at   | protein kinase, AMP-activated, alpha 1 catalytic subunit                         | Prkaa1                                                                                      | 200.5961352 | 35.61294898 | 5.632674 | 0.004965 |
| 1452598_at   | GIN5 complex subunit 1 (Psf1 homolog)                                            | Gins1                                                                                       | 480.0297467 | 85.69129007 | 5.60185  | 0.004701 |
| 1418206_at   | stromal cell-derived factor 2-like 1                                             | Sdf2l1                                                                                      | 605.0623477 | 108.3661225 | 5.583501 | 0.004174 |
| 1426416_a_at | Yip1 domain family, member 4                                                     | Yipf4                                                                                       | 1735.016098 | 310.7620808 | 5.583101 | 0.004149 |
| 1449140_at   | NudC domain containing 2                                                         | Nudcd2                                                                                      | 358.6600715 | 64.50757448 | 5.559968 | 0.00424  |
| 1454739_at   | cell division cycle 27 homolog (S. cerevisiae)                                   | Cdc27                                                                                       | 641.719939  | 116.3617697 | 5.514869 | 0.003976 |
| 1460359_at   | armadillo repeat containing, X-linked 3 /// hypothetical protein LOC100044266    | Armcx3 ///<br>LOC100044266                                                                  | 367.1425886 | 67.6949668  | 5.423484 | 0.004304 |
| 1425048_a_at | predicted gene, ENSMUSG00000060128 /// high mobility group box 1 /// similar to  | ENSMUSG00000060128 ///<br>Hmgb1 ///<br>LOC100045876 ///<br>LOC100045972 ///<br>LOC100048378 | 5082.537831 | 952.9499716 | 5.333478 | 0.003976 |
| 1431037_a_at | ELAV (embryonic lethal, abnormal vision, Drosophila)-like 1 (Hu antigen R)       | Elavl1                                                                                      | 392.378813  | 74.53709392 | 5.264209 | 0.004591 |
| 1424020_at   | ADP-ribosylation factor-like 6 interacting protein 6                             | Arl6ip6                                                                                     | 1208.470606 | 230.2812811 | 5.247802 | 0.004591 |
| 1425166_at   | retinoblastoma-like 1 (p107)                                                     | Rbl1                                                                                        | 504.0908649 | 96.19788921 | 5.240145 | 0.004304 |
| 1418895_at   | src family associated phosphoprotein 2                                           | Skap2                                                                                       | 2301.140462 | 445.1506956 | 5.169352 | 0.002608 |
| 1437478_s_at | EF hand domain containing 2                                                      | Efhd2                                                                                       | 1737.101895 | 339.757911  | 5.112764 | 0.004679 |
| 1435702_s_at | tyrosine 3-monooxygenase/tryptophan 5-monooxygenase activation protein, epsilon  | Ywhae                                                                                       | 512.421311  | 100.4604153 | 5.100729 | 0.00477  |
| 1431050_at   | ribosomal protein S6 kinase, polypeptide 5                                       | Rps6ka5                                                                                     | 75.77797417 | 14.91973494 | 5.079043 | 0.004343 |
| 1455156_at   | striatin, calmodulin binding protein                                             | Strn                                                                                        | 590.717005  | 117.8793064 | 5.011202 | 0.004701 |
| 1417471_s_at | DNA segment, Chr 1, ERATO Doi 622, expressed                                     | D1Ert622e                                                                                   | 540.483463  | 109.3412022 | 4.943091 | 0.002608 |
| 1424902_at   | plexin domain containing 1                                                       | Plxdc1                                                                                      | 330.8010492 | 67.61040262 | 4.892754 | 0.004681 |
| 1424243_at   | RWD domain containing 4A                                                         | Rwdd4a                                                                                      | 384.7159944 | 78.63211021 | 4.892607 | 0.004591 |
| 1457321_at   | RIKEN cDNA D130037M23 gene                                                       | D130037M23Rik                                                                               | 193.174832  | 39.67568794 | 4.868846 | 0.004405 |
| 1424924_at   | SEC63-like (S. cerevisiae)                                                       | Sec63                                                                                       | 322.6389189 | 66.34120599 | 4.863326 | 0.002536 |
| 1428976_at   | thymopoietin                                                                     | Tmpo                                                                                        | 1105.053115 | 227.704659  | 4.853011 | 0.004405 |
| 1452247_at   | fragile X mental retardation gene 1, autosomal homolog                           | Fxr1                                                                                        | 123.4782673 | 25.46393251 | 4.849144 | 0.004784 |
| 1418622_at   | RAB2A, member RAS oncogene family                                                | Rab2a                                                                                       | 1087.095774 | 225.2463628 | 4.826252 | 0.004343 |
| 1434408_at   | ataxin 3                                                                         | Atxn3                                                                                       | 216.3280101 | 44.95802226 | 4.811778 | 0.004304 |
| 1448441_at   | CDC28 protein kinase 1b                                                          | Cks1b                                                                                       | 253.0712833 | 52.94221559 | 4.780142 | 0.003808 |
| 1448571_a_at | glia maturation factor, beta                                                     | Gmfb                                                                                        | 593.9633075 | 124.3259232 | 4.77747  | 0.004922 |
| 1451315_at   | transmembrane protein 101                                                        | Tmem101                                                                                     | 183.9733944 | 38.57203436 | 4.769606 | 0.003976 |
| 1424105_a_at | pituitary tumor-transforming gene 1                                              | Pttg1                                                                                       | 648.3459437 | 136.2120003 | 4.75983  | 0.004911 |
| 1455488_at   | RIKEN cDNA 6230416J20 gene                                                       | 6230416J20Rik                                                                               | 418.2408013 | 88.37542442 | 4.732546 | 0.004304 |
| 1434884_at   | metadherin                                                                       | Mtdh                                                                                        | 300.6261436 | 63.81999837 | 4.710532 | 0.004467 |
| 1415945_at   | minichromosome maintenance deficient 5, cell division cycle 46 (S. cerevisiae)   | Mcm5                                                                                        | 1183.354543 | 254.9893768 | 4.640799 | 0.004304 |

|              |                                                                                  |                                                         |             |             |          |          |
|--------------|----------------------------------------------------------------------------------|---------------------------------------------------------|-------------|-------------|----------|----------|
| 1421077_at   | SERTA domain containing 3                                                        | Sertad3                                                 | 779.6791079 | 168.9169157 | 4.615755 | 0.004304 |
| 1429712_at   | RIKEN cDNA 6230416C02 gene /// ethanol induced 1 /// KRAB box and zinc finger, C | 6230416C0<br>2Rik ///<br>Etohi1 ///<br>RP24-<br>87L14.2 | 116.3547798 | 25.2999039  | 4.599021 | 0.004681 |
| 1418334_at   | DBF4 homolog (S. cerevisiae)                                                     | Dbf4                                                    | 1050.727853 | 229.5991249 | 4.576358 | 0.004681 |
| 1431087_at   | SPC24, NDC80 kinetochore complex component, homolog (S. cerevisiae)              | Spc24                                                   | 340.5162884 | 74.45671183 | 4.573346 | 0.004681 |
| 1416868_at   | cyclin-dependent kinase inhibitor 2C (p18, inhibits CDK4)                        | Cdkn2c                                                  | 1264.27974  | 276.5551376 | 4.571529 | 0.004591 |
| 1422554_at   | necdin-like 2                                                                    | Ndn12                                                   | 377.6222598 | 83.30974364 | 4.53275  | 0.004405 |
| 1448883_at   | legumain                                                                         | Lgmn                                                    | 554.5575337 | 123.7787631 | 4.480232 | 0.004974 |
| 1429897_a_at | DNA segment, Chr 16, ERATO Doi 472, expressed                                    | D16Ert472<br>e                                          | 990.4200199 | 221.2162158 | 4.477158 | 0.004681 |
| 1425098_at   | zinc finger protein 106                                                          | Zfp106                                                  | 84.66614713 | 18.92506915 | 4.473756 | 0.004405 |
| 1437904_at   | RNA binding motif protein 45                                                     | Rbm45                                                   | 1440.84557  | 322.4578244 | 4.468323 | 0.004304 |
| 1435167_at   | RAN binding protein 6                                                            | Ranbp6                                                  | 156.4795157 | 35.039736   | 4.465773 | 0.003956 |
| 1421895_at   | eukaryotic translation initiation factor 2, subunit 3, structural gene X-linked  | Eif2s3x ///<br>LOC100048<br>746                         | 345.2027147 | 77.46664387 | 4.456147 | 0.004922 |
| 1430996_at   | ethanolamine kinase 1                                                            | Etnk1                                                   | 99.24734934 | 22.36943119 | 4.43674  | 0.004645 |
| 1423531_a_at | heterogeneous nuclear ribonucleoprotein A1                                       | Hnrnpa1                                                 | 1741.321246 | 393.310984  | 4.427339 | 0.004965 |
| 1420898_at   | synaptosomal-associated protein 23                                               | Snap23                                                  | 283.7329715 | 64.24356287 | 4.41652  | 0.004405 |
| 1434225_at   | SWA-70 protein                                                                   | Swap70                                                  | 1432.97726  | 326.5446964 | 4.388304 | 0.002608 |
| 1436204_at   | RIKEN cDNA 1110059G02 gene                                                       | 1110059G0<br>2Rik                                       | 1326.185312 | 302.458487  | 4.384685 | 0.004304 |
| 1418565_at   | Serpine1 mRNA binding protein 1                                                  | Serbp1                                                  | 116.7123431 | 26.63835951 | 4.381364 | 0.004974 |
| 1444437_at   | ubiquitin specific peptidase 34                                                  | Usp34                                                   | 98.39342448 | 22.50712691 | 4.371656 | 0.004304 |
| 1447640_s_at | pre B-cell leukemia transcription factor 3                                       | Pbx3                                                    | 160.141491  | 36.72210021 | 4.360902 | 0.004701 |
| 1420916_at   | PRP40 pre-mRNA processing factor 40 homolog A (yeast)                            | Prpf40a                                                 | 359.7755495 | 82.60897734 | 4.355163 | 0.002569 |
| 1454955_at   | importin 7                                                                       | Ipo7                                                    | 837.0248628 | 192.2282641 | 4.354328 | 0.002488 |
| 1452717_at   | solute carrier family 25 (mitochondrial carrier, phosphate carrier), member 24   | Slc25a24                                                | 1154.591398 | 265.5666181 | 4.347653 | 0.004591 |
| 1455698_at   | SEC62 homolog (S. cerevisiae)                                                    | Sec62                                                   | 182.9983292 | 42.48701256 | 4.307159 | 0.004405 |
| 1423520_at   | lamin B1                                                                         | Lmnb1                                                   | 410.3231287 | 95.54620499 | 4.294499 | 0.004701 |
| 1440459_at   | senataxin                                                                        | Setx                                                    | 130.633702  | 30.58473774 | 4.271206 | 0.003665 |
| 1423744_x_at | eukaryotic translation initiation factor 2, subunit 3, structural gene X-linked  | Eif2s3x                                                 | 2073.281074 | 488.9060112 | 4.240654 | 0.004591 |
| 1421644_at   | schlafen 3                                                                       | Slnf3                                                   | 47.57384304 | 11.2373244  | 4.233556 | 0.002931 |
| 1434242_at   | ubiquitin specific peptidase 37                                                  | Usp37                                                   | 363.5878047 | 86.1291686  | 4.221425 | 0.004807 |
| 1434068_s_at | expressed sequence AI662270                                                      | AI662270                                                | 3038.478427 | 726.6851763 | 4.181286 | 0.004149 |
| 1451122_at   | isopentenyl-diphosphate delta isomerase                                          | Idi1                                                    | 1097.034615 | 264.7242717 | 4.144065 | 0.004405 |
| 1450012_x_at | tyrosine 3-monooxygenase/tryptophan 5-monooxygenase activation protein, gamma po | Ywhag                                                   | 1309.590458 | 317.5786243 | 4.123673 | 0.004681 |
| 1442656_at   | Myelination associated SUR4-like protein (Masr)                                  | Elov16                                                  | 350.1865831 | 85.16763205 | 4.111733 | 0.004405 |
| 1455634_at   | Son DNA binding protein                                                          | Son                                                     | 735.4941213 | 178.9339501 | 4.110422 | 0.004688 |
| 1439790_at   | serine (or cysteine) peptidase inhibitor, clade B, member 9                      | Serpnb9                                                 | 68.56323771 | 16.72143396 | 4.10032  | 0.002488 |
| 1426269_at   | vesicle-associated membrane protein 7                                            | Vamp7                                                   | 469.7675772 | 114.7756931 | 4.092919 | 0.004591 |
| 1416832_at   | solute carrier family 39 (metal ion transporter), member 8                       | Slc39a8                                                 | 105.2614478 | 25.75576226 | 4.086909 | 0.004304 |
| 1433531_at   | acyl-CoA synthetase long-chain family member 4                                   | Acsl4                                                   | 614.832663  | 151.1817307 | 4.066845 | 0.004681 |
| 1438855_x_at | tumor necrosis factor, alpha-induced protein 2                                   | Tnfaip2                                                 | 53.83751816 | 13.33821157 | 4.036337 | 0.003976 |
| 1437747_at   | ubiquitination factor E4A, UFD2 homolog                                          | Ube4a                                                   | 245.960585  | 61.07415107 | 4.027245 | 0.003665 |

|              | (S. cerevisiae)                                                                          |                            |             |             |          |          |
|--------------|------------------------------------------------------------------------------------------|----------------------------|-------------|-------------|----------|----------|
| 1434468_at   | OTU domain containing 4                                                                  | Otud4                      | 1969.208286 | 491.3407208 | 4.007826 | 0.003976 |
| 1418656_at   | LSM5 homolog, U6 small nuclear RNA associated (S. cerevisiae)                            | Lsm5                       | 1046.896666 | 262.0121675 | 3.995603 | 0.004405 |
| 1460431_at   | glucosaminyl (N-acetyl) transferase 1, core 2                                            | Gcnt1                      | 75.55402277 | 18.9621415  | 3.984467 | 0.004304 |
| 1451064_a_at | phosphoserine aminotransferase 1                                                         | Psat1                      | 999.6666855 | 250.9089286 | 3.984181 | 0.004467 |
| 1439487_at   | ligase IV, DNA, ATP-dependent                                                            | Lig4                       | 220.5288102 | 55.42378499 | 3.978956 | 0.004591 |
| 1416034_at   | CD24a antigen /// predicted gene, EG621324                                               | Cd24a /// EG621324         | 218.5273435 | 55.30609847 | 3.951234 | 0.004974 |
| 1433571_at   | serine incorporator 5                                                                    | Serinc5                    | 313.2389919 | 79.54356587 | 3.937955 | 0.002931 |
| 1448958_at   | interferon alpha responsive gene                                                         | Ifrg15                     | 317.5500088 | 80.98334522 | 3.921177 | 0.004681 |
| 1434076_at   | WD repeat domain 37                                                                      | Wdr37                      | 1396.919658 | 358.577213  | 3.895729 | 0.004149 |
| 1424202_at   | SEH1-like (S. cerevisiae)                                                                | Seh1l                      | 513.3788318 | 132.6342906 | 3.870634 | 0.004343 |
| 1415975_at   | calcium regulated heat stable protein 1                                                  | Carhsp1                    | 339.6291942 | 87.82765221 | 3.866996 | 0.004681 |
| 1452059_at   | solute carrier family 35, member F5                                                      | Slc35f5                    | 87.12994133 | 22.6522115  | 3.846421 | 0.004591 |
| 1423795_at   | splicing factor proline/glutamine rich (polypyrimidine tract binding protein associated) | Sfpq                       | 2270.613859 | 591.8536491 | 3.836445 | 0.004591 |
| 1455059_at   | helicase with zinc finger domain                                                         | Helz                       | 166.6433573 | 43.50361348 | 3.830564 | 0.004174 |
| 1443733_x_at | polymerase (DNA-directed), delta 3, accessory subunit                                    | Pold3                      | 173.9276309 | 45.43671619 | 3.827909 | 0.00424  |
| 1423445_at   | Rho-associated coiled-coil containing protein kinase 1                                   | Rock1                      | 994.1639641 | 259.8970894 | 3.825222 | 0.004304 |
| 1435081_at   | synaptophysin-like protein                                                               | Sypl                       | 339.7304369 | 89.35583275 | 3.801995 | 0.004174 |
| 1434079_s_at | minichromosome maintenance deficient 2 mitotin (S. cerevisiae)                           | Mcm2                       | 1842.522685 | 487.273065  | 3.781294 | 0.004591 |
| 1418399_at   | potassium channel tetramerisation domain containing 9                                    | Kctd9                      | 169.3890337 | 45.01300578 | 3.763113 | 0.004174 |
| 1424343_a_at | eukaryotic translation initiation factor 1A                                              | Eif1a                      | 607.850755  | 161.7983778 | 3.756841 | 0.004701 |
| 1421188_at   | chemokine (C-C motif) receptor 2                                                         | Ccr2                       | 162.7871863 | 43.35490545 | 3.754758 | 0.004867 |
| 1416011_x_at | EH-domain containing 1                                                                   | Ehd1                       | 391.2924147 | 104.5307311 | 3.743324 | 0.004523 |
| 1416556_at   | tetraspanin 31                                                                           | Tspan31                    | 1356.65045  | 363.267041  | 3.734582 | 0.004681 |
| 1422946_a_at | DNA methyltransferase (cytosine-5) 1                                                     | Dnmt1                      | 1679.520085 | 450.3220571 | 3.729598 | 0.003976 |
| 1438814_at   | ---                                                                                      | ---                        | 1772.905593 | 475.7335627 | 3.726678 | 0.003202 |
| 1433897_at   | expressed sequence AI597468                                                              | AI597468                   | 861.0779292 | 231.4965153 | 3.719615 | 0.003202 |
| 1431320_a_at | myosin Va                                                                                | Myo5a                      | 215.4660363 | 58.46872933 | 3.68515  | 0.004405 |
| 1438578_a_at | BTB (POZ) domain containing 10 /// similar to BTB (POZ) domain containing 10             | Btbd10 /// LOC100047893    | 652.2856138 | 177.7538092 | 3.669601 | 0.004864 |
| 1423207_at   | transmembrane protein 167                                                                | Tmem167                    | 346.8352368 | 94.65848979 | 3.664069 | 0.003665 |
| 1425186_at   | LMBR1 domain containing 1                                                                | Lmbrd1                     | 111.5976884 | 30.52332029 | 3.656145 | 0.004461 |
| 1454671_at   | insulin induced gene 1                                                                   | Insig1                     | 347.489763  | 95.23214128 | 3.648871 | 0.004701 |
| 1426914_at   | MARVEL (membrane-associating) domain containing 2                                        | Marveld2                   | 68.78601311 | 18.88946584 | 3.641501 | 0.004922 |
| 1460536_at   | RIKEN cDNA 2310079F09 gene                                                               | 2310079F09Rik              | 531.5273065 | 146.3710742 | 3.631368 | 0.00477  |
| 1452655_at   | zinc finger, DHHC domain containing 2                                                    | Zdhhc2                     | 268.998938  | 74.45361533 | 3.612973 | 0.004304 |
| 1438951_x_at | nucleoporin 54                                                                           | Nup54                      | 487.6379737 | 135.0918347 | 3.609678 | 0.004304 |
| 1423369_at   | fragile X mental retardation syndrome 1 homolog                                          | Fmr1                       | 726.5575835 | 201.3255782 | 3.608869 | 0.004304 |
| 1423885_at   | laminin, gamma 1                                                                         | Lamc1                      | 374.0550159 | 103.7686375 | 3.604702 | 0.004701 |
| 1427098_at   | WW domain containing E3 ubiquitin protein ligase 1                                       | Wwp1                       | 116.2373575 | 32.29785987 | 3.598918 | 0.00496  |
| 1416873_a_at | cyclin-dependent kinase 2                                                                | Cdk2                       | 555.4089699 | 154.415097  | 3.596857 | 0.004532 |
| 1455278_at   | WD repeat domain 37                                                                      | Wdr37                      | 219.6490831 | 61.32457109 | 3.581747 | 0.00477  |
| 1417398_at   | related RAS viral (r-ras) oncogene homolog 2                                             | Rras2                      | 947.710974  | 265.7998843 | 3.565506 | 0.00477  |
| 1429775_a_at | G protein-coupled receptor 137B /// G protein-coupled receptor 137B, pseudogene          | Gpr137b /// Gpr137b-ps /// | 255.4552307 | 71.75230799 | 3.560237 | 0.004922 |

|              |                                                                                       | LOC100044<br>979               |             |             |                 |                 |
|--------------|---------------------------------------------------------------------------------------|--------------------------------|-------------|-------------|-----------------|-----------------|
| 1450028_a_at | LanC (bacterial lantibiotic synthetase component C)-like 2 /// similar to testis      | Lanc12 ///<br>LOC100045<br>439 | 282.1991828 | 79.96554812 | <b>3.52901</b>  | <b>0.004591</b> |
| 1436400_at   | fragile X mental retardation gene 1, autosomal homolog                                | Fxr1                           | 127.8448292 | 36.41985651 | <b>3.510306</b> | <b>0.004304</b> |
| 1425193_at   | RIKEN cDNA 2010106G01 gene                                                            | 2010106G0<br>1Rik              | 723.6542052 | 206.2575806 | <b>3.508497</b> | <b>0.004304</b> |
| 1429491_s_at | Rap1 interacting factor 1 homolog (yeast)                                             | Rif1                           | 626.4562722 | 179.2533992 | <b>3.494808</b> | <b>0.003808</b> |
| 1460623_at   | src family associated phosphoprotein 2                                                | Skap2                          | 440.7112761 | 126.2258282 | <b>3.491451</b> | <b>0.004591</b> |
| 1434310_at   | bone morphogenic protein receptor, type II (serine/threonine kinase)                  | Bmpr2                          | 600.3666383 | 172.6579954 | <b>3.477201</b> | <b>0.004547</b> |
| 1447784_x_at | solute carrier family 38, member 9                                                    | Slc38a9                        | 323.3844878 | 93.32381201 | <b>3.465187</b> | <b>0.004174</b> |
| 1436448_a_at | prostaglandin-endoperoxide synthase 1                                                 | Ptgs1                          | 52.56485644 | 15.21694314 | <b>3.454364</b> | <b>0.004681</b> |
| 1426395_s_at | eukaryotic translation initiation factor 3, subunit J                                 | Eif3j                          | 347.8657102 | 100.8658037 | <b>3.448797</b> | <b>0.004304</b> |
| 1435390_at   | exonuclease domain containing 1                                                       | Exod1                          | 255.4959596 | 74.40236971 | <b>3.433976</b> | <b>0.004304</b> |
| 1436128_at   | pleckstrin homology domain containing, family A (phosphoinositide binding specific)   | Plekha8                        | 91.47548999 | 26.83517392 | <b>3.408791</b> | <b>0.004304</b> |
| 1416681_at   | ubiquitin protein ligase E3A                                                          | Ube3a                          | 68.05629307 | 19.97268887 | <b>3.407468</b> | <b>0.00424</b>  |
| 1426356_at   | RIKEN cDNA 6330578E17 gene                                                            | 6330578E1<br>7Rik              | 295.5878857 | 86.98330775 | <b>3.398214</b> | <b>0.004922</b> |
| 1423723_s_at | TAR DNA binding protein                                                               | Tardbp                         | 2587.482399 | 761.6019347 | <b>3.397421</b> | <b>0.004681</b> |
| 1424500_at   | UTP6, small subunit (SSU) processome component, homolog (yeast)                       | Utp6                           | 785.2037939 | 231.2506056 | <b>3.395467</b> | <b>0.004784</b> |
| 1415963_at   | heterogeneous nuclear ribonucleoprotein H2                                            | Hnrnph2                        | 3451.162444 | 1016.710575 | <b>3.394439</b> | <b>0.00424</b>  |
| 1428103_at   | a disintegrin and metallopeptidase domain 10                                          | Adam10                         | 2543.971277 | 749.9306268 | <b>3.392275</b> | <b>0.004922</b> |
| 1442348_at   | ---                                                                                   | ---                            | 102.575094  | 30.34029764 | <b>3.38082</b>  | <b>0.004405</b> |
| 1433505_a_at | leucine rich repeat containing 8D                                                     | Lrrc8d                         | 719.9402328 | 213.2260657 | <b>3.376418</b> | <b>0.004591</b> |
| 1439127_at   | expressed sequence AI314180                                                           | AI314180                       | 133.2002826 | 39.87695468 | <b>3.340282</b> | <b>0.004965</b> |
| 1455079_at   | DCN1, defective in cullin neddylation 1, domain containing 4 ( <i>S. cerevisiae</i> ) | Dcun1d4                        | 315.9436223 | 94.62700114 | <b>3.338832</b> | <b>0.004591</b> |
| 1433756_at   | S100P binding protein                                                                 | S100pbp                        | 723.1460968 | 217.1919266 | <b>3.329526</b> | <b>0.004922</b> |
| 1449194_at   | mitochondrial ribosomal protein S25                                                   | Mrps25                         | 530.9271102 | 159.474285  | <b>3.329233</b> | <b>0.004304</b> |
| 1455094_s_at | ubiquitin-conjugating enzyme E2G 1 (UBC7 homolog, <i>C. elegans</i> )                 | Ube2g1                         | 411.5593453 | 123.668706  | <b>3.327918</b> | <b>0.004149</b> |
| 1431295_a_at | syntaxin 18                                                                           | Stx18                          | 65.62271295 | 19.76879916 | <b>3.319509</b> | <b>0.004591</b> |
| 1449348_at   | membrane protein, palmitoylated 6 (MAGUK p55 subfamily member 6)                      | Mpp6                           | 550.3376931 | 165.8555332 | <b>3.318175</b> | <b>0.004304</b> |
| 1436942_at   | RIKEN cDNA A930035D04 gene                                                            | A930035D0<br>4Rik              | 59.9811246  | 18.11944256 | <b>3.310318</b> | <b>0.004882</b> |
| 1433955_at   | bromodomain and WD repeat domain containing 1                                         | Brwd1                          | 214.3706124 | 65.16656293 | <b>3.28958</b>  | <b>0.004304</b> |
| 1453064_at   | Ewing's tumor-associated antigen 1                                                    | Etaa1                          | 271.682281  | 82.65575306 | <b>3.286913</b> | <b>0.004701</b> |
| 1430029_a_at | tetraspanin 31                                                                        | Tspan31                        | 849.8964896 | 258.6104327 | <b>3.286397</b> | <b>0.002488</b> |
| 1424589_s_at | RNA-binding region (RNP1, RRM) containing 3                                           | Rnpc3                          | 152.4416516 | 46.39004477 | <b>3.286085</b> | <b>0.004174</b> |
| 1448844_at   | cytochrome b5 type B                                                                  | Cyb5b                          | 829.0986728 | 253.8472229 | <b>3.266133</b> | <b>0.003976</b> |
| 1435834_at   | Fanconi anemia, complementation group F                                               | Fancf                          | 162.1284353 | 50.08557783 | <b>3.237028</b> | <b>0.004965</b> |
| 1433930_at   | heparanase                                                                            | Hpse                           | 209.1460103 | 64.73556685 | <b>3.230774</b> | <b>0.004681</b> |
| 1443628_at   | ---                                                                                   | ---                            | 310.5941112 | 96.33423377 | <b>3.22413</b>  | <b>0.00492</b>  |
| 1428386_at   | acyl-CoA synthetase long-chain family member 3                                        | Acs13                          | 67.58978562 | 21.05634801 | <b>3.209948</b> | <b>0.002931</b> |
| 1437177_at   | La ribonucleoprotein domain family, member 4                                          | Larp4                          | 274.9203708 | 85.70178413 | <b>3.207872</b> | <b>0.004591</b> |
| 1460352_s_at | phosphatidylinositol 3 kinase, regulatory subunit, polypeptide 4, p150                | Pik3r4                         | 506.129703  | 157.904302  | <b>3.205294</b> | <b>0.004681</b> |
| 1436770_x_at | proteasome (prosome, macropain)                                                       | Psm1                           | 73.2024485  | 23.00241344 | <b>3.182381</b> | <b>0.004591</b> |



|              |                                                                                  |                                |             |             |          |          |  |
|--------------|----------------------------------------------------------------------------------|--------------------------------|-------------|-------------|----------|----------|--|
|              | subunit, alpha type 1                                                            |                                |             |             |          |          |  |
| 1439428_x_at | GDP-mannose 4, 6-dehydratase                                                     | Gmids                          | 45.82448197 | 14.41857483 | 3.178156 | 0.004225 |  |
| 1416155_at   | high mobility group box 3                                                        | Hmgb3                          | 948.357149  | 299.0687446 | 3.171034 | 0.004304 |  |
| 1416308_at   | UDP-glucose dehydrogenase                                                        | Ugdh                           | 846.1658588 | 266.9199509 | 3.170111 | 0.004149 |  |
| 1435366_at   | RIKEN cDNA D430042O09 gene                                                       | D430042O09Rik                  | 63.60536995 | 20.18259811 | 3.151496 | 0.00424  |  |
| 1428930_at   | transmembrane protein 29                                                         | Tmem29                         | 234.093327  | 74.82093036 | 3.128714 | 0.003168 |  |
| 1417172_at   | ubiquitin-conjugating enzyme E2L 6                                               | Ube2l6                         | 92.22738794 | 29.49877896 | 3.126482 | 0.00477  |  |
| 1419276_at   | ectonucleotide pyrophosphatase/phosphodiesterase 1                               | Enpp1                          | 228.447683  | 73.07233143 | 3.126323 | 0.004922 |  |
| 1451559_a_at | dehydrogenase/reductase (SDR family) member 4                                    | Dhrs4                          | 415.6177137 | 132.9715074 | 3.125615 | 0.004681 |  |
| 1434174_at   | LysM, putative peptidoglycan-binding, domain containing 3                        | Lysmd3                         | 624.3768916 | 200.0481301 | 3.121133 | 0.004681 |  |
| 1419585_at   | retinitis pigmentosa 2 homolog (human)                                           | Rp2h                           | 91.48056261 | 29.36644384 | 3.115139 | 0.004701 |  |
| 1454905_at   | inhibitor of Bruton agammaglobulinemia tyrosine kinase                           | Ibtk                           | 683.8423686 | 219.7902126 | 3.111341 | 0.004965 |  |
| 1434630_at   | ankyrin repeat domain 28                                                         | Ankrd28                        | 387.2979353 | 125.0140701 | 3.098035 | 0.004174 |  |
| 1438517_at   | WW domain-containing oxidoreductase                                              | Wwox                           | 87.26855476 | 28.29496276 | 3.084243 | 0.004405 |  |
| 1418402_at   | a disintegrin and metallopeptidase domain 19 (meltrin beta) /// similar to metal | Adam19 /// LOC100045780        | 2052.073467 | 665.5131365 | 3.083445 | 0.004304 |  |
| 1425059_at   | protein arginine N-methyltransferase 6                                           | Prmt6                          | 209.6816304 | 68.41970601 | 3.064638 | 0.004681 |  |
| 1454741_s_at | transmembrane protein 164                                                        | Tmem164                        | 632.1646997 | 206.5327369 | 3.060845 | 0.003976 |  |
| 1435548_at   | MRS2 magnesium homeostasis factor homolog ( <i>S. cerevisiae</i> )               | Mrs2                           | 149.9090149 | 49.01608433 | 3.058364 | 0.003976 |  |
| 1442599_at   | solute carrier family 12 (potassium/chloride transporters), member 9             | Slc12a9                        | 135.4324834 | 44.65180735 | 3.03308  | 0.00477  |  |
| 1437296_at   | protein kinase N2                                                                | Pkn2                           | 153.4636681 | 50.62225958 | 3.031545 | 0.004922 |  |
| 1456918_at   | Ras association (RalGDS/AF-6) and pleckstrin homology domains 1                  | Raph1                          | 642.6903499 | 212.5919757 | 3.023117 | 0.0042   |  |
| 1422503_s_at | poly (ADP-ribose) polymerase family, member 1                                    | Parp1                          | 865.9360452 | 286.6367936 | 3.021022 | 0.004304 |  |
| 1453332_at   | RIKEN cDNA 2410002O22 gene /// hypothetical protein LOC100044479                 | 2410002O22Rik /// LOC100044479 | 223.7323401 | 74.14067441 | 3.017673 | 0.004663 |  |
| 1429698_at   | mitochondrial transcription termination factor                                   | Mterf                          | 271.8467933 | 90.14215279 | 3.015757 | 0.004461 |  |
| 1432374_a_at | DNA segment, Chr 5, Wayne State University 178, expressed                        | D5Wsu178e                      | 83.66428589 | 27.94787459 | 2.993583 | 0.004149 |  |
| 1435637_at   | integrin alpha FG-GAP repeat containing 1                                        | Iifg1                          | 193.3731036 | 65.17108009 | 2.967161 | 0.004304 |  |
| 1418258_s_at | dynein light chain LC8-type 2                                                    | Dynll2                         | 517.5388422 | 174.6032577 | 2.964085 | 0.004681 |  |
| 1428069_at   | cell division cycle associated 7                                                 | Cdca7                          | 523.7338348 | 177.0905396 | 2.957435 | 0.004405 |  |
| 1423521_at   | lamin B1                                                                         | Lmnb1                          | 557.0629927 | 188.5687327 | 2.954164 | 0.004591 |  |
| 1419763_at   | NFKB activating protein                                                          | Nkap                           | 30.4111823  | 10.40356925 | 2.923149 | 0.004304 |  |
| 1430274_a_at | STARD3 N-terminal like                                                           | Stard3nl                       | 349.0443786 | 119.5010927 | 2.920847 | 0.004405 |  |
| 1444746_at   | ---                                                                              | ---                            | 732.3028837 | 251.2529398 | 2.914604 | 0.004663 |  |
| 1448126_at   | family with sequence similarity 60, member A                                     | Fam60a                         | 372.9219744 | 129.0780609 | 2.88912  | 0.00477  |  |
| 1439256_x_at | G protein-coupled receptor 137B, pseudogene                                      | Gpr137b-ps                     | 242.8845087 | 84.2649055  | 2.882392 | 0.004681 |  |
| 1448026_at   | chromodomain helicase DNA binding protein 7                                      | Chd7                           | 307.4703177 | 106.9552384 | 2.874757 | 0.004149 |  |
| 1460583_at   | golgi transport 1 homolog B ( <i>S. cerevisiae</i> )                             | Golt1b                         | 41.78857525 | 14.57169367 | 2.867791 | 0.004802 |  |
| 1436714_at   | LIM domain containing preferred translocation partner in lipoma                  | Lpp                            | 285.6022101 | 99.69320937 | 2.864811 | 0.00477  |  |
| 1437009_a_at | ring finger protein 115                                                          | Rnf115                         | 2335.58246  | 818.2890105 | 2.854227 | 0.004681 |  |
| 1419235_s_at | helicase (DNA) B                                                                 | Helb                           | 1405.986149 | 494.9480625 | 2.840674 | 0.002488 |  |

|              |                                                                                                                               |                        |             |             |          |          |
|--------------|-------------------------------------------------------------------------------------------------------------------------------|------------------------|-------------|-------------|----------|----------|
| 1448301_s_at | serine (or cysteine) peptidase inhibitor, clade B, member 1a                                                                  | Serpinb1a              | 33.21723308 | 11.83586576 | 2.80649  | 0.00424  |
| 1431921_a_at | similar to Stromal antigen 1 /// stromal antigen 1                                                                            | LOC100045442 /// Stag1 | 896.908291  | 320.1342743 | 2.801663 | 0.004911 |
| 1455351_at   | RIKEN cDNA 2610101N10 gene                                                                                                    | 2610101N1 ORik         | 252.9683937 | 90.80060468 | 2.785977 | 0.004304 |
| 1429911_at   | microcephaly, primary autosomal recessive 1                                                                                   | Mcph1                  | 215.6508113 | 77.45787406 | 2.784104 | 0.004922 |
| 1433718_a_at | chromobox homolog 1 (Drosophila HP1 beta)                                                                                     | Cbx1                   | 437.9897609 | 157.3801742 | 2.783005 | 0.004827 |
| 1426999_at   | zinc finger CCCH type containing 14                                                                                           | Zc3h14                 | 1409.531496 | 512.0910969 | 2.752501 | 0.004461 |
| 1424222_s_at | RAD23b homolog (S. cerevisiae)                                                                                                | Rad23b                 | 1225.73665  | 445.337925  | 2.752374 | 0.004701 |
| 1417454_at   | cullin 4B                                                                                                                     | Cul4b                  | 1554.354651 | 565.4582377 | 2.748841 | 0.004304 |
| 1416925_at   | karyopherin (importin) beta 1                                                                                                 | Kpnb1                  | 1383.813047 | 512.0283921 | 2.70261  | 0.004149 |
| 1423076_at   | sorting nexin 9                                                                                                               | Snx9                   | 466.7447549 | 172.7609486 | 2.70168  | 0.004701 |
| 1428323_at   | glycerol phosphate dehydrogenase 2, mitochondrial                                                                             | Gpd2                   | 179.9888009 | 66.71410918 | 2.697912 | 0.004701 |
| 1438767_at   | oncostatin M                                                                                                                  | Osm                    | 609.3342396 | 226.3142055 | 2.692426 | 0.004864 |
| 1437362_at   | coiled-coil domain containing 76                                                                                              | Ccdc76                 | 207.1343962 | 77.07903831 | 2.687299 | 0.003913 |
| 1416998_at   | RRS1 ribosome biogenesis regulator homolog (S. cerevisiae)                                                                    | Rrs1                   | 566.3303356 | 211.9729946 | 2.67171  | 0.004591 |
| 1439802_at   | serine/threonine kinase 35                                                                                                    | Stk35                  | 63.93157215 | 23.96156113 | 2.668089 | 0.00477  |
| 1418039_at   | RAB, member of RAS oncogene family-like 3                                                                                     | Rabl3                  | 427.3961198 | 161.0446213 | 2.653899 | 0.002783 |
| 1459977_x_at | COX10 homolog, cytochrome c oxidase assembly protein, heme A: farnesyltransferase                                             | Cox10                  | 27.41771938 | 10.35027121 | 2.648986 | 0.00424  |
| 1436297_a_at | glutamate receptor, ionotropic, N-methyl D-aspartate-associated protein 1 (gluta family with sequence similarity 92, member A | Grina                  | 956.0970998 | 361.7811256 | 2.64275  | 0.002488 |
| 1441212_at   | phosphoribosyl pyrophosphate amidotransferase                                                                                 | Fam92a                 | 35.44221014 | 13.4312034  | 2.638796 | 0.004304 |
| 1452831_s_at | oxidative-stress responsive 1                                                                                                 | Ppat                   | 688.7691266 | 263.1357272 | 2.617543 | 0.004864 |
| 1426933_at   | DnaJ (Hsp40) homolog, subfamily C, member 21                                                                                  | Oxsr1                  | 540.688302  | 207.5746804 | 2.604789 | 0.004405 |
| 1460711_at   | coiled-coil domain containing 41                                                                                              | Dnajc21                | 748.7239015 | 288.9207479 | 2.591451 | 0.004922 |
| 1453045_at   | cullin 5                                                                                                                      | Ccdc41                 | 586.4170879 | 226.8728247 | 2.584783 | 0.004681 |
| 1428287_at   | myotrophin                                                                                                                    | Cul5                   | 235.3199786 | 91.13752792 | 2.582032 | 0.004922 |
| 1420472_at   | methyltransferase like 10                                                                                                     | Mtpn                   | 148.6885763 | 57.7090896  | 2.576519 | 0.004591 |
| 1428582_at   | RIKEN cDNA 9030624J02 gene                                                                                                    | Mettl10                | 612.9660386 | 238.4384902 | 2.570751 | 0.004405 |
| 1432304_a_at | PRP4 pre-mRNA processing factor 4 homolog B (yeast)                                                                           | 9030624J02Rik          | 38.40751363 | 14.95397029 | 2.568382 | 0.004304 |
| 1425498_at   | coiled coil domain containing 28B                                                                                             | Prpf4b                 | 812.7117825 | 316.5888568 | 2.567089 | 0.00424  |
| 1452937_s_at | transmembrane protein 97                                                                                                      | Ccdc28b                | 136.7701891 | 53.62151217 | 2.550659 | 0.00424  |
| 1416376_at   | similar to RAN, member RAS oncogene family /// RAN, member RAS oncogene family                                                | Tmem97                 | 141.2339712 | 55.39536382 | 2.549563 | 0.004405 |
| 1460551_at   | bromodomain containing 1 /// similar to bromodomain containing 1                                                              | LOC100045999 /// Ran   | 1024.717132 | 403.7355084 | 2.53809  | 0.004679 |
| 1434821_at   | UDP-glucuronate decarboxylase 1                                                                                               | Brd1 /// LOC100045983  | 580.3059858 | 228.7899706 | 2.536414 | 0.004304 |
| 1426275_a_at | demethyl-Q 7                                                                                                                  | Uxs1                   | 229.5460824 | 90.87679183 | 2.525904 | 0.004922 |
| 1416665_at   | ---                                                                                                                           | Coq7                   | 512.6628926 | 203.8150346 | 2.515334 | 0.004965 |
| 1447442_at   | cDNA sequence BC003885 /// predicted gene, EG623867                                                                           | ---                    | 224.2856228 | 89.56997717 | 2.504027 | 0.004461 |
| 1424377_at   | growth hormone inducible transmembrane protein                                                                                | BC003885 /// EG623867  | 639.396336  | 259.5832229 | 2.463165 | 0.004795 |
| 1415881_at   | TBC1 domain family, member 8B                                                                                                 | Ghitm                  | 971.7221199 | 396.4101245 | 2.451305 | 0.004974 |
| 1430133_at   |                                                                                                                               | Tbc1d8b                | 487.3744011 | 201.3632598 | 2.420374 | 0.004681 |

|              |                                                                                    |               |             |             |          |          |
|--------------|------------------------------------------------------------------------------------|---------------|-------------|-------------|----------|----------|
| 1426460_a_at | UDP-glucose pyrophosphorylase 2                                                    | Ugp2          | 187.9154661 | 78.48055469 | 2.394421 | 0.004581 |
| 1456846_at   | predicted gene, EG382639                                                           | EG382639      | 802.8759751 | 337.0393745 | 2.382143 | 0.004681 |
| 1445402_at   | ---                                                                                | ---           | 43.94407234 | 18.45538591 | 2.381097 | 0.004304 |
| 1454680_at   | DNA segment, Chr 5, ERATO Doi 579, expressed                                       | D5ErtD579e    | 402.1379462 | 169.759284  | 2.368872 | 0.004405 |
| 1430258_at   | RIKEN cDNA 2810422J05 gene                                                         | 2810422J05Rik | 67.59056646 | 28.53854742 | 2.368395 | 0.00488  |
| 1419924_at   | Folliculin interacting protein 1, mRNA (cDNA clone MGC:100017 IMAGE:30543296)      | Fnip1         | 30.49815365 | 12.89068181 | 2.365907 | 0.003323 |
| 1448033_at   | TatD DNase domain containing 1                                                     | Tatdn1        | 105.9221132 | 44.8072413  | 2.363951 | 0.004681 |
| 1428693_at   | RIKEN cDNA 2610044O15 gene                                                         | 2610044O15Rik | 36.57324335 | 15.50082754 | 2.359438 | 0.004681 |
| 1424390_at   | nucleoporin like 1                                                                 | Nupl1         | 707.8991339 | 300.3248409 | 2.357111 | 0.004461 |
| 1439074_a_at | Son DNA binding protein                                                            | Son           | 131.0487698 | 57.09819891 | 2.295147 | 0.004304 |
| 1451343_at   | vacuolar protein sorting 36 (yeast)                                                | Vps36         | 647.5225685 | 287.9138405 | 2.249015 | 0.004405 |
| 1436828_a_at | tumor protein D52-like 2                                                           | Tpd52l2       | 433.5836866 | 193.2350958 | 2.243814 | 0.004827 |
| 1416031_s_at | minichromosome maintenance deficient 7 (S. cerevisiae)                             | Mcm7          | 1368.708968 | 615.0230482 | 2.22546  | 0.00477  |
| 1419253_at   | methylenetetrahydrofolate dehydrogenase (NAD+ dependent), methenyltetrahydrofolate | Mthfd2        | 1090.318059 | 490.932205  | 2.220914 | 0.004304 |
| 1438510_a_at | histidyl-tRNA synthetase                                                           | Hars          | 2663.609115 | 1215.780161 | 2.190864 | 0.004591 |
| 1438032_at   | leucine-rich repeats and calponin homology (CH) domain containing 1                | Lrch1         | 367.0263927 | 169.0891173 | 2.170609 | 0.004922 |
| 1455611_at   | protein inhibitor of activated STAT 1                                              | Pias1         | 271.7306197 | 125.3941876 | 2.167011 | 0.00477  |
| 1417200_at   | transmembrane protein 183A                                                         | Tmem183a      | 737.3197884 | 353.6291356 | 2.085009 | 0.004591 |
| 1449661_at   | Suppressor of zeste 12 homolog (Drosophila), mRNA (cDNA clone IMAGE:3485208)       | Suz12         | 26.29074891 | 12.64308533 | 2.079457 | 0.004304 |
| 1419193_a_at | glia maturation factor, gamma                                                      | Gmfg          | 1017.528391 | 492.1724182 | 2.067423 | 0.004304 |
| 1419996_s_at | aryl hydrocarbon receptor nuclear translocator                                     | Arnt          | 273.426008  | 133.7560186 | 2.044215 | 0.004174 |
| 1419819_s_at | SEC63-like (S. cerevisiae)                                                         | Sec63         | 438.1749908 | 214.350306  | 2.0442   | 0.003976 |
| 1448816_at   | prostaglandin I2 (prostacyclin) synthase                                           | Ptgis         | 101.388485  | 49.83750708 | 2.034381 | 0.004965 |
| 1445220_at   | ---                                                                                | ---           | 35.20251665 | 17.37703458 | 2.025807 | 0.00424  |
| 1429759_at   | ribosomal protein S6 kinase polypeptide 6                                          | Rps6ka6       | 44.78353995 | 22.16851152 | 2.020142 | 0.004762 |
| 1449770_x_at | transmembrane protein 191C                                                         | Tmem191c      | 214.7280223 | 106.6320018 | 2.01373  | 0.004681 |
| 1438204_at   | Histone cluster 1, H1c (Hist1h1c), mRNA                                            | Hist1h1c      | 44.46885439 | 89.82779404 | 0.495046 | 0.004304 |
| 1434640_at   | neurensin 2                                                                        | Nrsn2         | 21.77554115 | 44.05793585 | 0.494248 | 0.004965 |
| 1418783_at   | transient receptor potential cation channel, subfamily M, member 5                 | Trpm5         | 10.70154111 | 21.67239468 | 0.493787 | 0.004965 |
| 1430728_at   | keratin associated protein 5-5                                                     | Krtap5-5      | 16.13058288 | 32.72580253 | 0.492901 | 0.004701 |
| 1450196_s_at | glycogen synthase 1, muscle                                                        | Gys1          | 17.09658965 | 34.79086555 | 0.49141  | 0.004405 |
| 1447346_s_at | RIKEN cDNA 5530400B01 gene                                                         | 5530400B01Rik | 61.40056389 | 125.7899919 | 0.48812  | 0.004461 |
| 1441017_at   | zinc finger, CCHC domain containing 14                                             | Zcchc14       | 46.99384801 | 96.3484799  | 0.487749 | 0.002608 |
| 1448662_at   | frizzled homolog 6 (Drosophila)                                                    | Fzd6          | 10.80856681 | 22.19408511 | 0.487002 | 0.004974 |
| 1436768_x_at | RIKEN cDNA E130112L23 gene                                                         | E130112L23Rik | 56.46271772 | 116.3832799 | 0.485145 | 0.004174 |
| 1453363_at   | calcium channel, voltage-dependent, gamma subunit 2                                | Cacng2        | 60.95319754 | 126.8007967 | 0.4807   | 0.004655 |
| 1439529_at   | RIKEN cDNA A430110N23 gene                                                         | A430110N23Rik | 53.31082734 | 111.0608603 | 0.480015 | 0.004701 |
| 1432107_at   | RIKEN cDNA 2310010M20 gene                                                         | 2310010M20Rik | 11.87863096 | 24.74794224 | 0.479985 | 0.004304 |
| 1420001_at   | DNA segment, Chr 7, ERATO Doi 1, expressed                                         | D7ErtD1e      | 28.67304729 | 60.02271476 | 0.477703 | 0.004304 |
| 1450556_at   | spectrin beta 1                                                                    | Spnb1         | 40.60137459 | 85.0808967  | 0.477209 | 0.004596 |
| 1432410_a_at | bone morphogenetic protein 7                                                       | Bmp7          | 13.76529223 | 28.86561384 | 0.476875 | 0.004645 |
| 1430078_a_at | 8-oxoguanine DNA-glycosylase 1                                                     | Ogg1          | 122.8831534 | 257.7246405 | 0.4768   | 0.004304 |

|              |                                                                                  |                             |             |             |          |          |
|--------------|----------------------------------------------------------------------------------|-----------------------------|-------------|-------------|----------|----------|
| 1425439_a_at | solute carrier family 41, member 3                                               | Slc41a3                     | 127.4667068 | 267.8608639 | 0.475869 | 0.004304 |
| 1427987_at   | scaffold attachment factor B2                                                    | Safb2                       | 302.1595367 | 635.440544  | 0.475512 | 0.004681 |
| 1421081_a_at | barrier to autointegration factor 1                                              | Banf1                       | 241.4114009 | 507.9690074 | 0.475248 | 0.004681 |
| 1422940_x_at | serine (or cysteine) peptidase inhibitor, clade B (ovalbumin), member 3B /// ser | Serpib3b<br>///<br>Serpib3c | 9.776038725 | 20.81661137 | 0.469627 | 0.004807 |
| 1437094_x_at | dynein, axonemal, intermediate chain 1                                           | Dnaic1                      | 19.08838754 | 40.97361655 | 0.46587  | 0.004681 |
| 1447743_x_at | exostoses (multiple) 2                                                           | Ext2                        | 36.54984374 | 78.48019204 | 0.465721 | 0.004591 |
| 1450795_at   | luteinizing hormone beta                                                         | Lhb                         | 21.10003275 | 45.42065692 | 0.464547 | 0.003202 |
| 1437604_x_at | adenomatosis polyposis coli down-regulated 1                                     | Apccd1                      | 38.44275965 | 82.85766925 | 0.463961 | 0.004591 |
| 1457463_at   | Down syndrome cell adhesion molecule-like 1                                      | Dscaml1                     | 38.5955693  | 83.7056635  | 0.461087 | 0.004461 |
| 1440227_at   | solute carrier family 5 (inositol transporters), member 3                        | Slc5a3                      | 92.43025982 | 201.571333  | 0.458549 | 0.004405 |
| 1437929_at   | dapper homolog 2, antagonist of beta-catenin (xenopus)                           | Dact2                       | 28.23481617 | 61.62184615 | 0.458195 | 0.002488 |
| 1431561_a_at | DEAH (Asp-Glu-Ala-His) box polypeptide 34                                        | Dhx34                       | 256.0544225 | 560.913048  | 0.456496 | 0.004458 |
| 1430937_at   | RIKEN cDNA A930016O22 gene                                                       | A930016O2<br>2Rik           | 41.70273216 | 91.53511103 | 0.455593 | 0.004681 |
| 1457823_at   | cysteine rich protein 61                                                         | Cyr61                       | 9.532557534 | 20.99528305 | 0.454033 | 0.004149 |
| 1426338_a_at | netrin G1                                                                        | Ntng1                       | 16.06040831 | 35.39613667 | 0.453733 | 0.002488 |
| 1457004_at   | DNA segment, Chr 15, Wayne State University 169, expressed                       | D15Wsu16<br>9e              | 59.69355763 | 131.7814352 | 0.452974 | 0.00477  |
| 1428717_at   | secernin 1                                                                       | Scrn1                       | 40.44165127 | 89.33518956 | 0.452696 | 0.004591 |
| 1456571_at   | decapping enzyme, scavenger                                                      | Dcps                        | 21.3649396  | 47.33197882 | 0.451385 | 0.004149 |
| 1421226_at   | triggering receptor expressed on myeloid cells 2                                 | Trem2                       | 59.30560955 | 132.1070211 | 0.448921 | 0.004304 |
| 1445054_at   | ---                                                                              | ---                         | 27.89155892 | 62.35355887 | 0.447313 | 0.004304 |
| 1428434_at   | zinc finger, CCHC domain containing 12                                           | Zcchc12                     | 40.81742689 | 91.35087652 | 0.44682  | 0.004149 |
| 1424392_at   | alcohol dehydrogenase, iron containing, 1                                        | Adhfe1                      | 12.3240682  | 27.73649018 | 0.444327 | 0.004681 |
| 1428707_at   | parathyrosin                                                                     | Ptms                        | 290.8779244 | 658.3556461 | 0.441825 | 0.004304 |
| 1420606_at   | neuropeptide FF-amide peptide precursor                                          | Npff                        | 83.46483937 | 189.3616012 | 0.44077  | 0.004405 |
| 1422574_at   | Max dimerization protein 4                                                       | Mxd4                        | 74.23151973 | 168.585113  | 0.440321 | 0.004922 |
| 1451815_at   | UDP-GlcNAc:betaGal beta-1,3-N-acetylglucosaminyltransferase 4                    | B3gnt4                      | 16.02215907 | 36.90556998 | 0.434139 | 0.004405 |
| 1428708_x_at | parathyrosin                                                                     | Ptms                        | 292.0159443 | 680.3625873 | 0.429206 | 0.003976 |
| 1439838_a_at | transmembrane inner ear                                                          | Tmie                        | 29.13611601 | 67.99735232 | 0.428489 | 0.004304 |
| 1438393_at   | ---                                                                              | ---                         | 18.26926473 | 42.65668654 | 0.428286 | 0.004149 |
| 1421659_at   | adrenergic receptor, alpha 1a                                                    | Adra1a                      | 17.91206794 | 42.12612569 | 0.425201 | 0.004174 |
| 1421388_at   | myocyte enhancer factor 2D                                                       | Mef2d                       | 114.0413595 | 269.8043877 | 0.422682 | 0.004461 |
| 1455125_at   | centaurin, beta 1                                                                | Centb1                      | 140.3887318 | 332.7542617 | 0.421899 | 0.004405 |
| 1424566_s_at | polymerase (RNA) III (DNA directed) polypeptide D                                | Polr3d                      | 99.33337788 | 236.0643978 | 0.420789 | 0.004718 |
| 1459858_x_at | cartilage acidic protein 1                                                       | Crtac1                      | 9.768587709 | 23.42455929 | 0.417023 | 0.004405 |
| 1453724_a_at | serine (or cysteine) peptidase inhibitor, clade F, member 1                      | Serpinf1                    | 65.01211421 | 156.5684809 | 0.415231 | 0.004566 |
| 1456291_x_at | scleraxis                                                                        | Scx                         | 12.41767638 | 30.05917135 | 0.413108 | 0.004591 |
| 1459911_at   | cerebellar degeneration-related protein 2-like                                   | Cdr2l                       | 45.63313926 | 110.6282989 | 0.412491 | 0.00477  |
| 1421150_at   | human immunodeficiency virus type I enhancer binding protein 3                   | Hivep3                      | 32.11131853 | 77.85403998 | 0.412455 | 0.003976 |
| 1450810_at   | follicle stimulating hormone receptor                                            | Fshr                        | 16.57354137 | 40.20909611 | 0.412184 | 0.004304 |
| 1420598_x_at | defensin related cryptdin, related sequence 2                                    | Defcr-rs2                   | 116.1675514 | 281.9665082 | 0.411991 | 0.004304 |
| 1426305_at   | uropod 1A                                                                        | Upk1a                       | 31.46116087 | 77.32787521 | 0.406854 | 0.004461 |
| 1433147_at   | caldesmon 1                                                                      | Cald1                       | 16.13442211 | 40.0067076  | 0.403293 | 0.004591 |
| 1421380_at   | insulin receptor                                                                 | Insr                        | 19.93856948 | 50.07481682 | 0.398176 | 0.004149 |
| 1442042_at   | ---                                                                              | ---                         | 111.626055  | 280.3677631 | 0.398142 | 0.004701 |

|              |                                                                                                                                                                    |                    |             |             |          |          |
|--------------|--------------------------------------------------------------------------------------------------------------------------------------------------------------------|--------------------|-------------|-------------|----------|----------|
| 1433084_at   | RIKEN cDNA 4930402C16 gene                                                                                                                                         | 4930402C16Rik      | 19.77432668 | 50.57561314 | 0.390985 | 0.004701 |
| 1442264_at   | RAS, guanyl releasing protein 2                                                                                                                                    | Rasgrp2            | 92.29880089 | 236.1260388 | 0.390888 | 0.004965 |
| 1427350_a_at | GTP binding protein 6 (putative)                                                                                                                                   | Gtpbp6             | 273.1349271 | 702.5871271 | 0.388756 | 0.004304 |
| 1424268_at   | spermine oxidase                                                                                                                                                   | Smox               | 78.55529764 | 202.3735126 | 0.38817  | 0.004802 |
| 1420266_at   | predicted gene, ENSMUSG00000074106                                                                                                                                 | ENSMUSG00000074106 | 90.3101769  | 232.7886109 | 0.387949 | 0.004591 |
| 1447524_at   | adaptor-related protein complex 3, mu 2 subunit                                                                                                                    | Ap3m2              | 39.60251094 | 102.8432526 | 0.385076 | 0.004681 |
| 1439778_at   | CDK5 and Abl enzyme substrate 1 (Cables1), mRNA                                                                                                                    | Cables1            | 10.74830057 | 28.00592162 | 0.383787 | 0.004701 |
| 1431227_at   | ---                                                                                                                                                                | ---                | 44.01001627 | 114.941821  | 0.382889 | 0.004756 |
| 1456167_at   | expressed sequence AA619741                                                                                                                                        | AA619741           | 72.87573716 | 191.1078637 | 0.381333 | 0.004461 |
| 1452975_at   | alanine-glyoxylate aminotransferase 2-like 1                                                                                                                       | Agxt2l1            | 15.41236835 | 42.13517854 | 0.365784 | 0.004922 |
| 1441762_at   | ---                                                                                                                                                                | ---                | 88.5483386  | 242.2965412 | 0.365454 | 0.00496  |
| 1447833_x_at | microfibrillar-associated protein 2                                                                                                                                | Mfap2              | 54.28531218 | 148.6387709 | 0.365216 | 0.004405 |
| 1440328_at   | nuclear autoantigenic sperm protein (histone-binding)                                                                                                              | Nasp               | 85.90359878 | 236.5464993 | 0.363157 | 0.004304 |
| 1427385_s_at | actinin, alpha 1                                                                                                                                                   | Actn1              | 20.84356288 | 57.62634713 | 0.361702 | 0.004591 |
| 1429261_at   | RIKEN cDNA 2210411K11 gene                                                                                                                                         | 2210411K11Rik      | 97.08613239 | 273.327473  | 0.355201 | 0.00477  |
| 1421541_a_at | myocyte enhancer factor 2B                                                                                                                                         | Mef2b              | 38.74110861 | 109.7740572 | 0.352917 | 0.00424  |
| 1450512_at   | netrin 4                                                                                                                                                           | Ntn4               | 23.91753272 | 68.287045   | 0.35025  | 0.004304 |
| 1441698_at   | ---                                                                                                                                                                | ---                | 123.3462462 | 359.6508824 | 0.342961 | 0.004681 |
| 1420183_at   | Loricrin, mRNA (cDNA clone IMAGE:4190845)                                                                                                                          | Lor                | 35.35657609 | 103.530593  | 0.341508 | 0.004591 |
| 1431734_a_at | DnaJ (Hsp40) homolog, subfamily B, member 4                                                                                                                        | Dnajb4             | 45.57086973 | 133.5679444 | 0.341181 | 0.004591 |
| 1458991_at   | ---                                                                                                                                                                | ---                | 57.45604037 | 169.4661515 | 0.339041 | 0.004591 |
| 1416006_at   | midkine                                                                                                                                                            | Mdk                | 60.19882127 | 183.777542  | 0.327564 | 0.004591 |
| 1455071_at   | zinc finger and BTB domain containing 7B                                                                                                                           | Zbtb7b             | 193.8974473 | 593.1843258 | 0.326876 | 0.004304 |
| 1422377_at   | vomer nasal 1 receptor, B4                                                                                                                                         | V1rb4              | 72.7171289  | 223.1912513 | 0.325806 | 0.004405 |
| 1447748_x_at | solute carrier family 29 (nucleoside transporters), member 2                                                                                                       | Slc29a2            | 22.22117706 | 69.42162994 | 0.32009  | 0.002488 |
| 1455903_at   | TBC1 domain family, member 4                                                                                                                                       | Tbc1d4             | 106.2861645 | 332.1037032 | 0.320039 | 0.004591 |
| 1420047_at   | MAF1 homolog (S. cerevisiae) (Maf1), mRNA                                                                                                                          | Maf1               | 26.85644918 | 85.0235151  | 0.315871 | 0.002488 |
| 1440565_at   | ---                                                                                                                                                                | ---                | 49.43336919 | 158.1226249 | 0.312627 | 0.004461 |
| 1429719_at   | forkhead box P4                                                                                                                                                    | Foxp4              | 76.45982537 | 250.5972316 | 0.30511  | 0.004688 |
| 1425167_a_at | guanine nucleotide binding protein (G protein), gamma transducing activity polyp CDNA fis, clone TRACH2013369, highly similar to ATP SYNTHASE ALPHA CHAIN, MITOCHO | Gngt1              | 12.76159427 | 44.80744835 | 0.28481  | 0.004591 |
| 1420037_at   | ---                                                                                                                                                                | Atp5a1             | 63.7485225  | 226.0868596 | 0.281965 | 0.004681 |
| 1428669_at   | brain expressed myelocytomatosis oncogene                                                                                                                          | Bmyc               | 148.6312156 | 530.3729303 | 0.280239 | 0.004149 |
| 1440930_a_at | scratch homolog 2, zinc finger protein (Drosophila)                                                                                                                | Scrt2              | 29.51166338 | 107.2363344 | 0.275202 | 0.004922 |
| 1419757_at   | phosphatidylinositol transfer protein, membrane-associated 2                                                                                                       | Pitpm2             | 66.01018182 | 241.8060727 | 0.272988 | 0.004304 |
| 1420570_x_at | T-cell leukemia/lymphoma 1B, 3                                                                                                                                     | Tcl1b3             | 573.8036493 | 2192.609736 | 0.261699 | 0.004174 |
| 1448346_at   | cofilin 1, non-muscle                                                                                                                                              | Cfl1               | 652.0445224 | 2618.999375 | 0.248967 | 0.004681 |
| 1457933_at   | Gene model 1964, (NCBI) (Gm1964), mRNA                                                                                                                             | Gm1964             | 30.98282237 | 126.7360664 | 0.244467 | 0.004149 |
| 1426816_at   | coiled-coil domain containing 64                                                                                                                                   | Ccdc64             | 88.77941723 | 366.602632  | 0.242168 | 0.004304 |
| 1420735_at   | gamma-aminobutyric acid (GABA-C) receptor, subunit rho 2                                                                                                           | Gabbr2             | 30.66894569 | 130.4720223 | 0.235061 | 0.002488 |
| 1447772_at   | pleckstrin homology domain-containing, family A (phosphoinositide binding specif                                                                                   | Plekha3            | 26.53068463 | 113.9776124 | 0.232771 | 0.004591 |

|              |                                                                                       |                                            |             |             |          |          |
|--------------|---------------------------------------------------------------------------------------|--------------------------------------------|-------------|-------------|----------|----------|
| 1451046_at   | similar to FOG /// zinc finger protein, multitype 1                                   | LOC100047651 /// Zfp1                      | 111.3975222 | 510.7959703 | 0.218086 | 0.004304 |
| 1427725_a_at | POU domain, class 2, transcription factor 2                                           | Pou2f2                                     | 62.80060997 | 300.2637841 | 0.209151 | 0.00424  |
| 1424518_at   | apolipoprotein L 9a /// apolipoprotein L 9b                                           | Apol9a /// Apol9b                          | 32.59148839 | 158.3127164 | 0.205868 | 0.004304 |
| 1438291_x_at | predicted gene, 100043481 /// predicted gene, OTTMUSG00000009529 /// ribosomal p      | 100043481 /// OTTMUSG00000009529 /// Rpl37 | 290.2414986 | 1423.868304 | 0.20384  | 0.004304 |
| 1416521_at   | selenoprotein W, muscle 1                                                             | Sepw1                                      | 163.4659867 | 837.9923906 | 0.195069 | 0.004304 |
| 1417163_at   | dual specificity phosphatase 10                                                       | Dusp10                                     | 28.50875898 | 149.2051304 | 0.191071 | 0.004591 |
| 1420089_at   | Nuclear factor of kappa light polypeptide gene enhancer in B-cells inhibitor, alpha 1 | Nfkbia                                     | 127.0714985 | 761.0390471 | 0.166971 | 0.002931 |
| 1422632_at   | cathepsin W                                                                           | Ctsw                                       | 119.7285443 | 924.3572102 | 0.129526 | 0.004304 |
| 1449381_a_at | protein kinase C and casein kinase substrate in neurons 1                             | Pacsin1                                    | 47.62102164 | 414.112804  | 0.114995 | 0.004397 |
| 1419117_at   | solute carrier family 22 (organic cation transporter), member 2                       | Slc22a2                                    | 23.1624614  | 209.4380849 | 0.110593 | 0.004681 |
| 1416368_at   | glutathione S-transferase, alpha 4                                                    | Gsta4                                      | 51.0542798  | 492.6365982 | 0.103635 | 0.002569 |
| 1426043_a_at | calpain 3                                                                             | Capn3                                      | 40.46137193 | 411.0452276 | 0.098435 | 0.004701 |
| 1435872_at   | ---                                                                                   | ---                                        | 107.5149397 | 1273.073501 | 0.084453 | 0.004591 |
| 1442434_at   | DNA segment, Chr 8, ERATO Doi 82, expressed                                           | D8Erd82e                                   | 66.71087227 | 947.6058753 | 0.070399 | 0.004405 |
